# Supplementary material for: An exploration of mortality risk factors in non-severe pneumonia in children using clinical data from Kenya
Source: Springer Nature journal article supplement (doi:10.1186/s12916-017-0963-9), 2017-11-10
Supplement: MOESM4 [file 15220286]

# Additional file 4

R analysis code for the pneumonia risk factors and decision curve analysis

```
list.of.packages=c("boot","gtools","reshape2","MASS","class","data.table","caret",
"ROCR","ggplot2","doParallel","knitr","DMwR","rmda","klaR","kernlab","glmnet", "mi
ce")
new.packages = list.of.packages[!(list.of.packages %in% installed.packages()[,"Pac
kage"])]
if(length(new.packages)) install.packages(new.packages,dependencies=T)

suppressMessages({
require(boot)
library(gtools)
library(reshape2)
require(MASS)
library(class)
library(data.table)
library(caret)
library(ROCR)
library(ggplot2)
library(doParallel)
library(caTools)
library(pls)
library(kernlab)
library(randomForest)
library(knitr)
library(glmnet)
library(pROC)
library(cowplot)
library(DMwR)
library(rmda)
library(mice)
library(VennDiagram)
})

cl=makePSOCKcluster(detectCores()-1)
registerDoParallel(cl)
```

## 1. Descriptive Statistics

```

load(file="pneumonia.descriptive.rda")
pneumonia.rp=pneumonia.rp[!is.na(outcome) & !(pen.pres=="No" & pneum.severity=="Very Severe" & (clinician.diagnosis=="Pneumonia (No classification) [ICD10: J18.9]" |
clinician.diagnosis=="Pneumonia (Very severe) [ICD10: J18.9C]")),copy(.SD)]

pneumonia.rp[,cormobidity:=ifelse(cormobidity > 0, 1, 0)]
pneumonia.rp[,cormobidity:=factor(cormobidity,levels = 0:1,labels = c("No","Yes"))
]
pneumonia.rp[,c("los", "lill", "oxygen.sat", "pulse.rate", "pcv.doses"):=NULL]

i=1
generate.stats <- function(column.data,col.name=NA,weights=NA){
  idx=get("i",.GlobalEnv)
  col.name.i = col.name[idx]
  idx=idx+1
  assign("i",idx,.GlobalEnv)
  if(class(column.data) %in% c("integer","numeric")){
    mean.stat <- round(mean(x=column.data,na.rm=T),2)
    range.stat <- paste0(" (",range(column.data,na.rm=T)[1]," - ",range(column.data,na.rm=T)[2],")")
    ret=data.frame(Indicator=c(col.name.i,"Missing"),
                  Levels=c("",""),
                  Value=c(paste0(mean.stat,range.stat),
                          paste0(sum(is.na(column.data))," (",paste0(round((sum(is.na(column.data))/length(column.data))*100,2),"%",")"))))
    return(ret)
  }

  if(class(column.data) %in% c("factor","character")){
    lvl.stats <- table(column.data,useNA="ifany")
    lvl.stats.prop <- round(prop.table(lvl.stats),4)*100
    ret.str <- paste0(lvl.stats," (",lvl.stats.prop,"%")")
    ret=data.frame(Indicator=c(col.name.i,
                              rep("",length(ret.str)-1)),
                  Levels=names(lvl.stats),
                  Value=ret.str)
    return(ret)
  }
}
res.stat=lapply(pneumonia.rp,generate.stats,col.name=names(pneumonia.rp))
i=1
res = do.call(rbind,res.stat)
row.names(res)=NULL
res$Levels=as.character(res$Levels)
res$Levels[is.na(res$Levels)]="Missing"
names(res)[names(res)=="Value"]="N (%)"
res$Indicator=as.character(res$Indicator)
res$Indicator=c("Pallor", "", "", "", "Outcome", "", "Respiratory Rate ≥ 70 breathes/minute", "", "Weight for Age Z-Score (WAZ)", "", "", "", "Pneumonia severity (WHO guidelines)", "", "", "", "Temperature ≥ 39 °C", "", "", "Female", "", "", "Dehydration", "", "", "", "Malaria", "", "", "Hospital located in malaria endemic area", "", "Acute Malnutrition", "", "Clinician pneumonia diagnosis", "", "", "", "Penicillin Monotherapy prescribed", "", "Age < 12 months", "", "Presence of comorbidity", "")

```

```

res$Levels[30]="Yes"
res$Levels[31]="No"

kable(res)

```

| Indicator                                  | Levels                   | N (%)         |
|--------------------------------------------|--------------------------|---------------|
| Pallor                                     | Mild/Moderate            | 374(3.5%)     |
|                                            | None                     | 7613(71.24%)  |
|                                            | Severe                   | 98(0.92%)     |
|                                            | Missing                  | 2602(24.35%)  |
| Outcome                                    | Alive                    | 10435(97.64%) |
|                                            | Dead                     | 252(2.36%)    |
| Respiratory Rate $\geq$ 70 breathes/minute | No                       | 6622(61.96%)  |
|                                            | Yes                      | 4065(38.04%)  |
| Weight for Age Z-Score (WAZ)               | Moderate                 | 1202(11.25%)  |
|                                            | None/Mild                | 8311(77.77%)  |
|                                            | Severe                   | 719(6.73%)    |
|                                            | Missing                  | 455(4.26%)    |
| Pneumonia severity (WHO guidelines)        | Non-severe               | 1960(18.34%)  |
|                                            | Severe                   | 6145(57.5%)   |
|                                            | Very Severe              | 2135(19.98%)  |
|                                            | Missing                  | 447(4.18%)    |
| Temperature $\geq$ 39 °C                   | No                       | 6577(61.54%)  |
|                                            | Yes                      | 1257(11.76%)  |
|                                            | Missing                  | 2853(26.7%)   |
| Female                                     | No                       | 5856(54.8%)   |
|                                            | Yes                      | 4736(44.32%)  |
|                                            | Missing                  | 95(0.89%)     |
| Dehydration                                | No dehydration           | 10026(93.81%) |
|                                            | Severe dehydration/shock | 0(0%)         |
|                                            | Some dehydration         | 622(5.82%)    |
|                                            | Missing                  | 39(0.36%)     |
| Malaria                                    | No malaria               | 9611(89.93%)  |
|                                            | Non-severe malaria       | 1076(10.07%)  |

| <b>Indicator</b>                         | <b>Levels</b>                              | <b>N (%)</b>  |
|------------------------------------------|--------------------------------------------|---------------|
|                                          | Severe malaria                             | 0(0%)         |
| Hospital located in malaria endemic area | Yes                                        | 4447(41.61%)  |
|                                          | No                                         | 6240(58.39%)  |
| Acute Malnutrition                       | Moderate                                   | 115(1.08%)    |
|                                          | None/at risk                               | 10572(98.92%) |
| Clinician pneumonia diagnosis            | Pneumonia(No classification)[ICD10: J18.9] | 260(2.43%)    |
|                                          | Pneumonia(Non Severe)[ICD10: J18.9A]       | 2395(22.41%)  |
|                                          | Pneumonia(severe)[ICD10: J18.9B]           | 7757(72.58%)  |
|                                          | Pneumonia(Very severe)[ICD10: J18.9C]      | 275(2.57%)    |
| Penicillin Monotherapy prescribed        | No                                         | 7038(65.86%)  |
|                                          | Yes                                        | 3649(34.14%)  |
| Age < 12 months                          | No                                         | 5719(53.51%)  |
|                                          | Yes                                        | 4968(46.49%)  |
| Presence of comorbidity                  | No                                         | 7330(68.59%)  |
|                                          | Yes                                        | 3357(31.41%)  |

## 2. Analysis with imputed data sets

```

load(file="pneumonia.rda")

pneumonia=pneumonia[,copy(.SD),.SDcols=c("age.lt.12m","female","tachypnoea","high.fever","pneum.severity.Non.severe","pneum.severity.Severe","pneum.severity.Very.Severe","pallor.Mild.Moderate","pallor.Severe","dehydration.Some.dehydration","waz.Moderate","waz.Severe","mal.end","malaria.Non.severe.malaria","cormobidity","mortality","ns.pneum","clinician.diagnosis")]

pneumonia[,cormobidity:=ifelse(cormobidity > 0, 1, 0)]
pneumonia[,`None Severe`=0]
pneumonia[pneum.severity.Non.severe==1 | pneum.severity.Severe==1,`None Severe`=1]
]
pneumonia[,pneum.severity.Non.severe:=NULL]
pneumonia[,pneum.severity.Severe:=NULL]
pneumonia[!is.na(clinician.diagnosis),clinician.diagnosis:=ifelse(clinician.diagnosis==1,NA_real_,
                                                                    ifelse(clinician
                                                                    .diagnosis==2,1,
                                                                    ifelse(cl
                                                                    inician.diagnosis==3,1,0)))]

pneumonia = pneumonia[,lapply(.SD,as.character)]
pneumonia = pneumonia[,lapply(.SD,as.numeric)]

setnames(pneumonia,
         c("age.lt.12m","female","high.fever","pneum.severity.Very.Severe","tachypnoea","waz.Moderate","waz.Severe","dehydration.Some.dehydration","mortality","pallor.Mild.Moderate","pallor.Severe","ns.pneum","clinician.diagnosis","None Severe","mal.end","malaria.Non.severe.malaria" , "cormobidity"),
         c("Age.lt.12m","Female","Temperature.gt.39C","Severe.Pneumonia","Respiratory.Rate.gt.70","Low.WAZ","Very.Low.WAZ","Some.Dehydration","Mortality","Mild.Mode.rate.Pallor","Severe.Pallor","Severity.Treatment","Clinician.Diagnosis","None.Seve.re","Malaria.Endemic","Non.Severe.Malaria","Comorbidities"))

pneumonia.copy = pneumonia[,copy(.SD)]

```

## 2.1 Traditional Logistic regression output (with imputation)

```

pneumonia.log= pneumonia[!is.na(Mortality)& (None.Severe==1 | Clinician.Diagnosis=
=1 | Severity.Treatment==1),copy(.SD)]
pneumonia.log[,c("Severity.Treatment","Clinician.Diagnosis","None.Severe","Severe.Pneumonia"):=NULL]
Comorbidities= pneumonia.log$Comorbidities
pneumonia.log=pneumonia.log[,lapply(.SD,factor)]
pneumonia.log$Comorbidities=Comorbidities
pneumonia.log.imp = mice(pneumonia.log,m=10,printFlag=F, maxit = 40, seed=197)
model.log = glm.mids(Mortality ~ ., data=pneumonia.log.imp, family = binomial(link="logit"))
model.log = pool(model.log)

kable(summary(model.log)[,c(1:2,5)], digits=4)

```

|                         | <b>est</b> | <b>se</b> | <b>Pr(&gt; t )</b> |
|-------------------------|------------|-----------|--------------------|
| (Intercept)             | -5.9110    | 0.2001    | 0.0000             |
| Age.lt.12m2             | 1.0609     | 0.1462    | 0.0000             |
| Female2                 | 0.4163     | 0.1318    | 0.0016             |
| Respiratory.Rate.gt.702 | 0.9120     | 0.1358    | 0.0000             |
| Temperature.gt.39C2     | 0.6845     | 0.1813    | 0.0003             |
| Mild.Moderate.Pallor2   | 1.4714     | 0.2106    | 0.0000             |
| Severe.Pallor2          | 1.4750     | 0.3665    | 0.0001             |
| Some.Dehydration2       | 0.0538     | 0.2349    | 0.8189             |
| Low.WAZ2                | 0.7310     | 0.1736    | 0.0000             |
| Very.Low.WAZ2           | 1.2987     | 0.1766    | 0.0000             |
| Malaria.Endemic2        | 0.2628     | 0.1325    | 0.0473             |
| Non.Severe.Malaria2     | -0.2078    | 0.2271    | 0.3602             |
| Comorbidities           | 0.6453     | 0.1576    | 0.0000             |

## 2.2 Machine Learning techniques that implement implicit feature selection

```

#Include interaction terms
suppressMessages({

  pneumonia[,Age.Respiratory.Rate:=ifelse(!is.na(Age.lt.12m) & !is.na(Respiratory.
Rate.gt.70),0,NA_integer_)]
  pneumonia[Age.Respiratory.Rate==0 & Age.lt.12m==1 & Respiratory.Rate.gt.70==1,Ag
e.Respiratory.Rate:=1]

  pneumonia[,Comorbidities.Low.WAZ:=ifelse(!is.na(Comorbidities) & !is.na(Low.WAZ)
,0,NA_integer_)]
  pneumonia[Comorbidities.Low.WAZ==0 & Comorbidities==1 & Low.WAZ==1,Comorbidities
.Low.WAZ:=1]

  pneumonia[,Comorbidities.Very.Low.WAZ:=ifelse(!is.na(Comorbidities) & !is.na(Ver
y.Low.WAZ),0,NA_integer_)]
  pneumonia[Comorbidities.Very.Low.WAZ==0 & Comorbidities==1 & Very.Low.WAZ==1,Com
orbidities.Very.Low.WAZ:=1]

  pneumonia[,Endemicity.Malaria:=ifelse(!is.na(Malaria.Endemic) & !is.na(Non.Sever
e.Malaria),0,NA_integer_)]
  pneumonia[Endemicity.Malaria==0 & Malaria.Endemic==1 & Non.Severe.Malaria==1,End
emicity.Malaria:=1]

  pneumonia[,Endemicity.Mild.Pallor:=ifelse(!is.na(Malaria.Endemic) & !is.na(Mild.
Moderate.Pallor),0,NA_integer_)]
  pneumonia[Endemicity.Mild.Pallor==0 & Malaria.Endemic==1 & Mild.Moderate.Pallor=
=1,Endemicity.Mild.Pallor:=1]

  pneumonia[,Endemicity.Severe.Pallor:=ifelse(!is.na(Malaria.Endemic) & !is.na(Sev
ere.Pallor),0,NA_integer_)]
  pneumonia[Endemicity.Severe.Pallor==0 & Malaria.Endemic==1 & Severe.Pallor==1,En
demicity.Severe.Pallor:=1]

  setcolororder(pneumonia,c("Age.lt.12m","Female","Respiratory.Rate.gt.70","Temperat
ure.gt.39C","Severe.Pneumonia","Mild.Moderate.Pallor","Severe.Pallor","Some.Dehydr
ation","Low.WAZ","Very.Low.WAZ","Malaria.Endemic","Non.Severe.Malaria","Comorbidit
ies","Severity.Treatment","Clinician.Diagnosis","None.Severe","Age.Respiratory.Rat
e","Comorbidities.Very.Low.WAZ","Comorbidities.Low.WAZ","Endemicity.Malaria","Ende
micity.Mild.Pallor","Endemicity.Severe.Pallor","Mortality"))
})

diagnosis=pneumonia[!is.na(Mortality) & (None.Severe==1 | Clinician.Diagnosis==1 |
Severity.Treatment==1),copy(.SD),.SDcols=c("None.Severe","Clinician.Diagnosis","Se
verity.Treatment")]
setnames(diagnosis,names(diagnosis),c("WHO.Guidelines","Clinician.Diagnosis","Peni
cillin.Monotherapy"))
diagnosis=diagnosis[,lapply(.SD,as.logical)]
venn.data=as.data.frame(matrix(c(
  0 ,0 ,0,
  1 ,0 ,0,
  0 ,1 ,0,
  0 ,0 ,1,
  1 ,1 ,0,
  1, 0, 1,

```

```

    0, 1, 1,
    1, 1, 1
  )
  ,nc = 3
  ,byrow = TRUE)
names(venn.data)=c("WHO.Guidelines","Clinician.Diagnosis","Penicillin.Monotherapy"
)
venn.data$Counts=0
venn.data$Counts[1]=diagnosis[!WHO.Guidelines & (!Clinician.Diagnosis | is.na(Clini
cian.Diagnosis)) & !Penicillin.Monotherapy,nrow(.SD)]
venn.data$Counts[2]=diagnosis[WHO.Guidelines & (!Clinician.Diagnosis | is.na(Clini
cian.Diagnosis)) & !Penicillin.Monotherapy,nrow(.SD)]
venn.data$Counts[3]=diagnosis[!is.na(Clinician.Diagnosis) & !WHO.Guidelines & Clin
ician.Diagnosis & !Penicillin.Monotherapy,nrow(.SD)]
venn.data$Counts[4]=diagnosis[!WHO.Guidelines & (!Clinician.Diagnosis | is.na(Clini
cian.Diagnosis)) & Penicillin.Monotherapy,nrow(.SD)]
venn.data$Counts[5]=diagnosis[WHO.Guidelines & Clinician.Diagnosis & !Penicillin.M
onotherapy,nrow(.SD)]
venn.data$Counts[6]=diagnosis[WHO.Guidelines & (!Clinician.Diagnosis | is.na(Clini
cian.Diagnosis)) & Penicillin.Monotherapy,nrow(.SD)]
venn.data$Counts[7]=diagnosis[!is.na(Clinician.Diagnosis) & !WHO.Guidelines & Clin
ician.Diagnosis & Penicillin.Monotherapy,nrow(.SD)]
venn.data$Counts[8]=diagnosis[WHO.Guidelines & Clinician.Diagnosis & Penicillin.Mo
notherapy,nrow(.SD)]

venn.data$Counts=paste0(venn.data$Counts,"(",round(venn.data$Counts/11225,4)*100,"
%)"")

kable(venn.data)

```

| WHO.Guidelines | Clinician.Diagnosis | Penicillin.Monotherapy | Counts       |
|----------------|---------------------|------------------------|--------------|
| 0              | 0                   | 0                      | 0(0%)        |
| 1              | 0                   | 0                      | 322(2.87%)   |
| 0              | 1                   | 0                      | 1592(14.18%) |
| 0              | 0                   | 1                      | 143(1.27%)   |
| 1              | 1                   | 0                      | 5124(45.65%) |
| 1              | 0                   | 1                      | 70(0.62%)    |
| 0              | 1                   | 1                      | 847(7.55%)   |
| 1              | 1                   | 1                      | 2589(23.06%) |

Venn diagram of the diagnosis



```
invisible({
  draw.triple.venn(area1 = 8105, area2 = 10152, area3 = 3649, n12 = 7713, n23 = 34
36, n13 = 2659,
  n123 = 2589, category = c("WHO Guidelines", "Clinician Diagnosis", "Penicillin M
onotherapy"), lty = "blank",
  fill = c("skyblue", "pink1", "mediumorchid"), cat.fontfamily = "corbel", print.mo
de=c("raw", "percent"), sigdigs=3, cat.dist = 0.005)
})
```

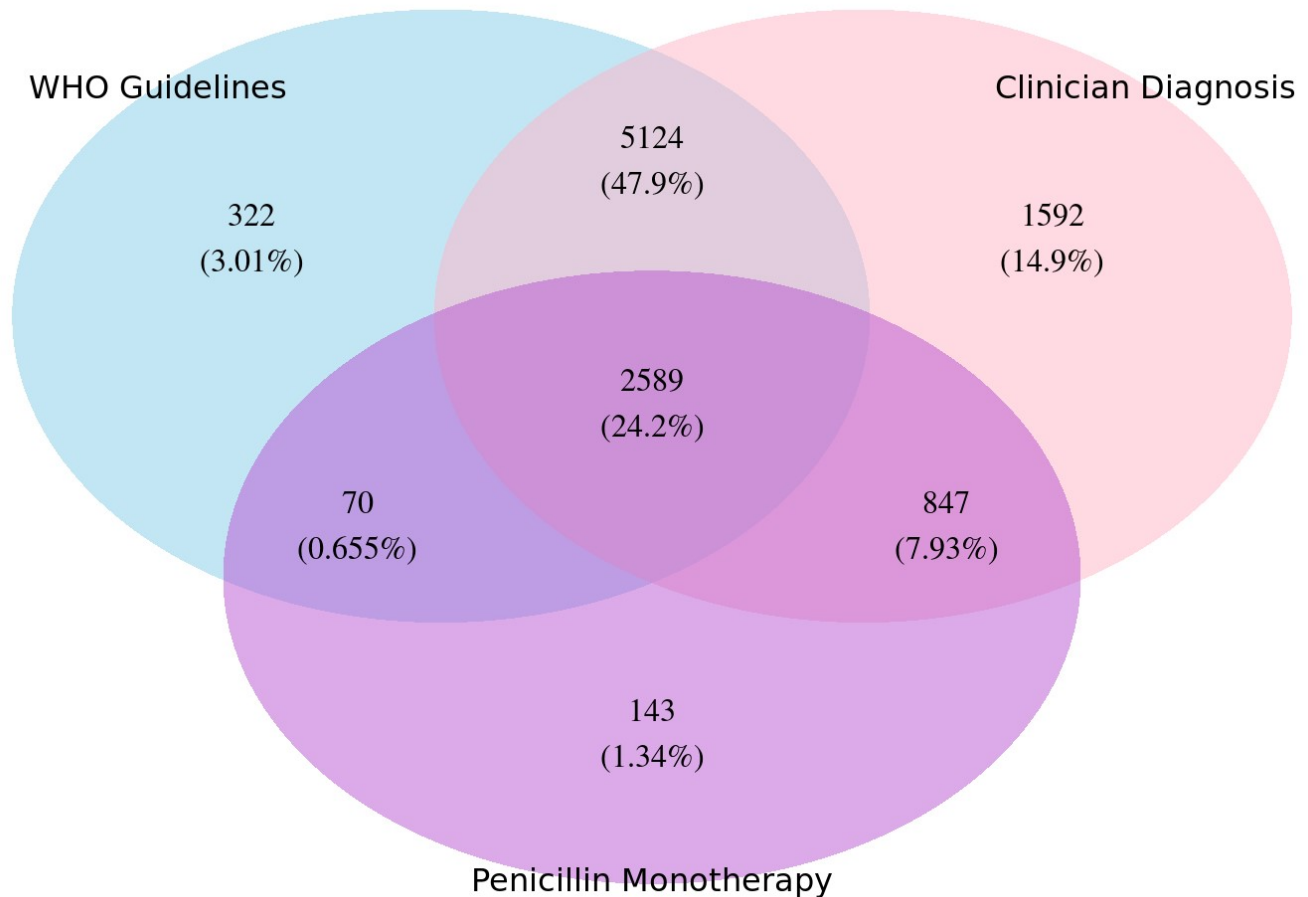

```
#Based on WHO guidelines
pneumonia.ns=pneumonia[None.Severe==1, copy(.SD)]
pneumonia.ns[,None.Severe:=NULL]
pneumonia.ns[,Clinician.Diagnosis:=NULL]
pneumonia.ns[,Severity.Treatment:=NULL]
pneumonia.ns[,Severe.Pneumonia:=NULL]

dataset=pneumonia.ns[!is.na(Mortality), copy(.SD)]

dataset$Mortality=factor(dataset$Mortality, levels=c(0,1), labels=c("Alive", "Dead"))

dataset.tr=copy(dataset)
dataset=as.data.frame(dataset)
col.len=length(dataset)

paste0(round(prop.table(table(dataset$Mortality))*100,2), "%")
```

```
## [1] "98.09 %" "1.91 %"
```

```

set.seed(197)
train.ids=sample(seq(nrow(dataset)), round(nrow(dataset)*0.67), replace=F)

dataset.x=dataset[,1:(col.len-1)]
dataset.y=dataset[,col.len]

dataset.x.tr=dataset.x[train.ids,]
dataset.y.tr=dataset.y[train.ids]

dataset.x.ts=dataset.x[-train.ids,]
dataset.y.ts=dataset.y[-train.ids]

tune.len=length(dataset.x.tr)

##For complete cases
dataset.comp=copy(dataset.tr)
dataset.comp=dataset.comp[complete.cases(dataset.comp), copy(.SD)]
dataset.comp=as.data.frame(dataset.comp)

set.seed(197)
train.ids.comp=sample(seq(nrow(dataset.comp)), round(nrow(dataset.comp)*0.67), replace=F)

dataset.x.comp=dataset.comp[,1:(col.len-1)]
dataset.y.comp=dataset.comp[,col.len]

dataset.x.tr.comp=dataset.x.comp[train.ids.comp,]
dataset.y.tr.comp=dataset.y.comp[train.ids.comp]

dataset.x.ts.comp=dataset.x.comp[-train.ids.comp,]
dataset.y.ts.comp=dataset.y.comp[-train.ids.comp]

tune.len=length(dataset.x.tr.comp)

##End data preparation for complete cases analysis
ctrl=trainControl(method="repeatedcv"
                  ,repeats=5
                  ,number=10
                  ,classProbs=T
                  ,allowParallel=T
                  ,search="random"
                  ,sampling = "smote"
                  ,returnResamp = "all"
                  ,summaryFunction=twoClassSummary)

ctrl.rf=trainControl(method="repeatedcv"
                    ,repeats=5
                    ,number=10
                    ,classProbs=T
                    ,search="grid"
                    ,allowParallel=T
                    ,sampling = "smote"

```

```
,returnResamp = "all"
,summaryFunction=twoClassSummary)
```

### Logistic Regression Model with implicit feature selection(with imputed data)

```
set.seed(197)
train.model.log=train(y=dataset.y.tr
, x=dataset.x.tr
, method="LogitBoost"
, trControl=ctrl
, tuneGrid=expand.grid(nIter=seq(5,200,15))
, importance=T
, metric="ROC"
)
plot(train.model.log)
```

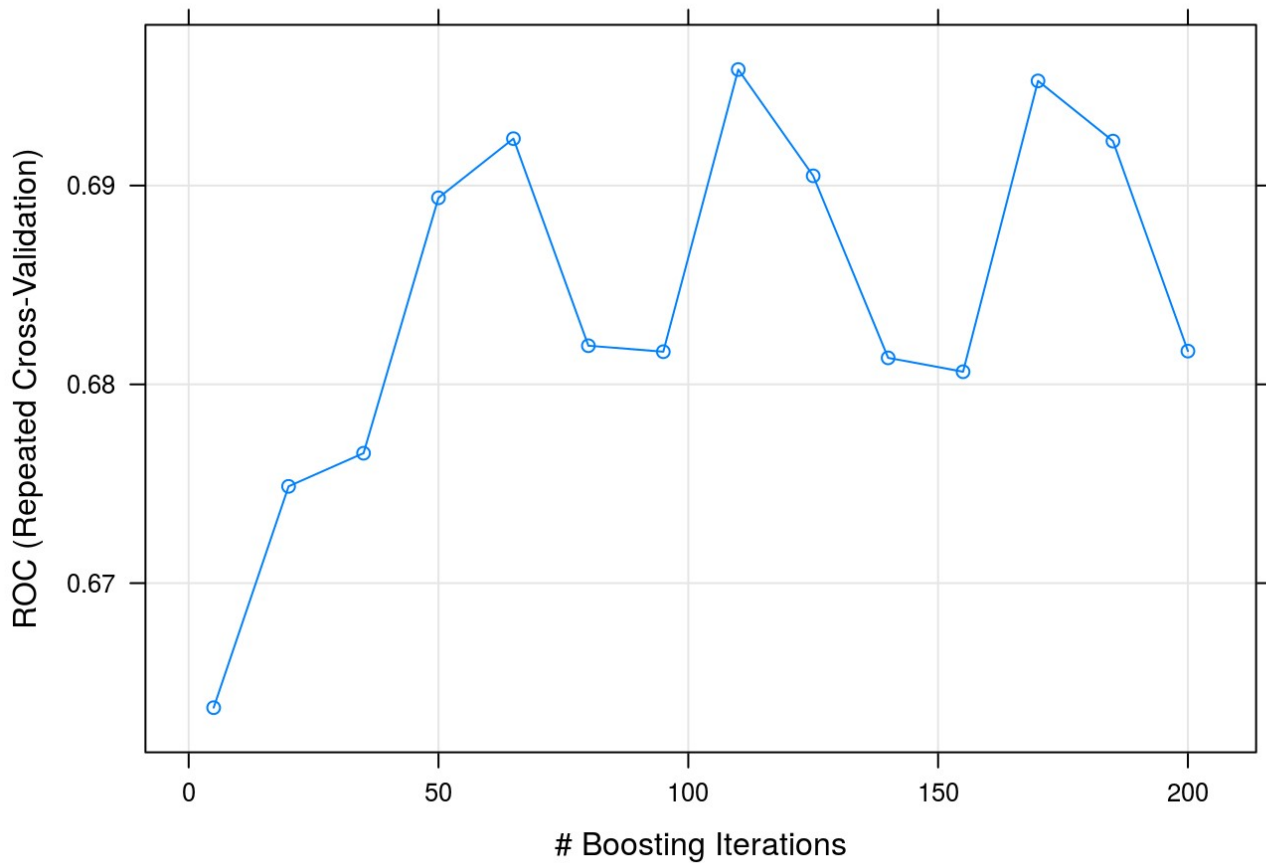

```
train.model.log$bestTune
```

```
## nIter
## 8 110
```

### Confusion matrix for logistic regression model (with imputed data)

```
pred.cm.log=predict(train.model.log,dataset.x.ts)
cm.log=confusionMatrix(pred.cm.log,dataset.y.ts,positive="Dead")
cm.log
```

```
## Confusion Matrix and Statistics
##
##           Reference
## Prediction Alive Dead
##      Alive 1951  19
##      Dead  108  10
##
##           Accuracy : 0.9392
##           95% CI : (0.9281, 0.949)
##      No Information Rate : 0.9861
##      P-Value [Acc > NIR] : 1
##
##           Kappa : 0.1164
##      McNemar's Test P-Value : 5.776e-15
##
##           Sensitivity : 0.344828
##           Specificity : 0.947547
##      Pos Pred Value : 0.084746
##      Neg Pred Value : 0.990355
##           Prevalence : 0.013889
##      Detection Rate : 0.004789
##      Detection Prevalence : 0.056513
##      Balanced Accuracy : 0.646187
##
##           'Positive' Class : Dead
##
```

### PLS Model (with imputed data)

```
set.seed(197)
train.model.pls=train(x=dataset.x.tr
                      ,y=dataset.y.tr
                      ,method="pls"
                      ,trControl=ctrl
                      ,tuneLength = tune.len
                      ,importance=T
                      ,probMethod="Bayes"
                      ,metric="ROC"
                      ,preProc=c(method="bagImpute"))
)
plot(train.model.pls)
```

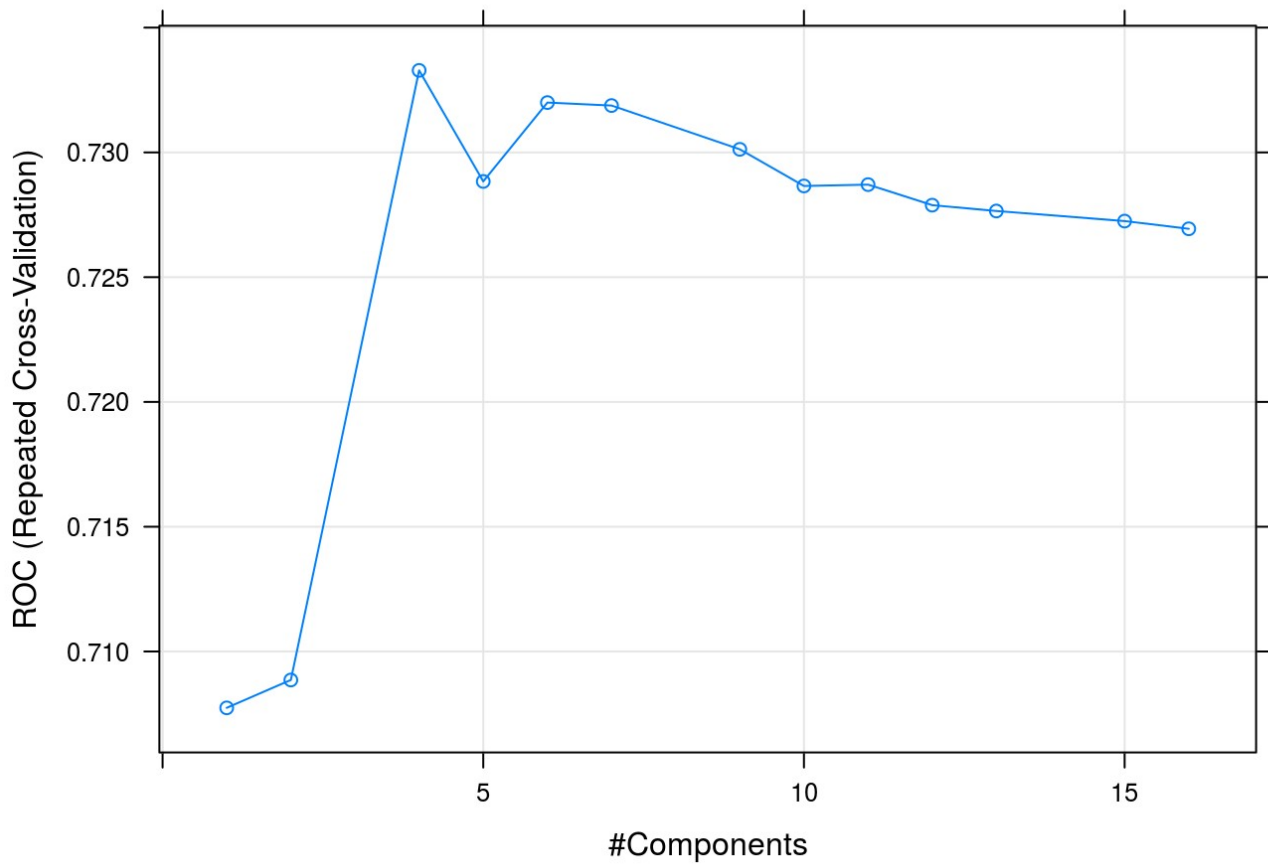

```
train.model.pls$bestTune
```

```
## ncomp  
## 3 4
```

#### Confusion matrix for PLS-DA model (with imputed data)

```
pred.cm.pls=predict(train.model.pls,dataset.x.ts)  
cm.pls=confusionMatrix(pred.cm.pls,dataset.y.ts,positive="Dead")  
cm.pls
```

```
## Confusion Matrix and Statistics
##
##           Reference
## Prediction Alive Dead
##     Alive 1842  16
##     Dead   783  34
##
##           Accuracy : 0.7013
##           95% CI : (0.6836, 0.7186)
##     No Information Rate : 0.9813
##     P-Value [Acc > NIR] : 1
##
##           Kappa : 0.0448
## Mcnemar's Test P-Value : <2e-16
##
##           Sensitivity : 0.68000
##           Specificity : 0.70171
##     Pos Pred Value : 0.04162
##     Neg Pred Value : 0.99139
##           Prevalence : 0.01869
##     Detection Rate : 0.01271
##     Detection Prevalence : 0.30542
##     Balanced Accuracy : 0.69086
##
##           'Positive' Class : Dead
##
```

### Support Vector Machine Model (with imputed data)

```
set.seed(197)
train.model.svm=train(x=dataset.x.tr
                      ,y=dataset.y.tr
                      ,method="svmLinear"
                      ,trControl=ctrl
                      ,tuneGrid=expand.grid(C=c(.0625,.125,.25,.5,1,2,4,8))
                      ,metric="ROC"
                      ,preProcess=c(method="bagImpute")
                      ,importance=T
                      ,probability=T
)
plot(train.model.svm)
```

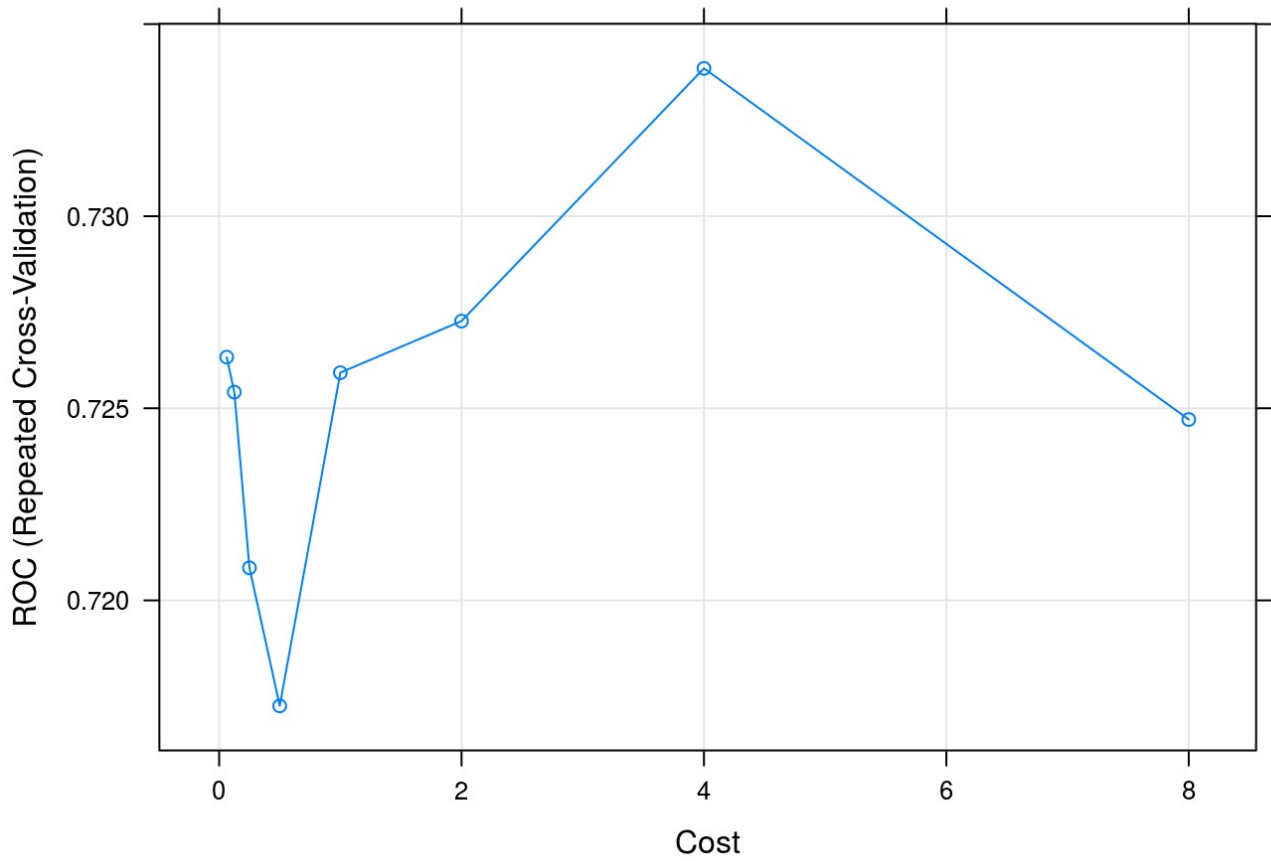

```
train.model.svm$bestTune
```

```
## C  
## 7 4
```

#### Confusion matrix for SVM model (with imputed data)

```
pred.cm.svm=predict(train.model.svm,dataset.x.ts)  
cm.svm=confusionMatrix(pred.cm.svm,dataset.y.ts,positive="Dead")  
cm.svm
```



```
## Confusion Matrix and Statistics
##
##           Reference
## Prediction Alive Dead
##      Alive 1934   18
##      Dead   691   32
##
##           Accuracy : 0.735
##           95% CI : (0.7178, 0.7516)
##      No Information Rate : 0.9813
##      P-Value [Acc > NIR] : 1
##
##           Kappa : 0.0496
##      McNemar's Test P-Value : <2e-16
##
##           Sensitivity : 0.64000
##           Specificity : 0.73676
##      Pos Pred Value : 0.04426
##      Neg Pred Value : 0.99078
##           Prevalence : 0.01869
##      Detection Rate : 0.01196
##      Detection Prevalence : 0.27028
##      Balanced Accuracy : 0.68838
##
##           'Positive' Class : Dead
##
```

#### Random Forest Model (with imputed data)

```
set.seed(197)
train.model.rf=train(x=dataset.x.tr
                    ,y=dataset.y.tr
                    ,method="rf"
                    ,trControl=ctrl.rf
                    ,tuneGrid=expand.grid(.mtry=c(1:tune.len))
                    ,importance=T
                    ,ntree=900
                    ,proximity=T
                    ,metric="ROC"
                    ,preProcess=c(method="bagImpute"))
)
plot(train.model.rf)
```

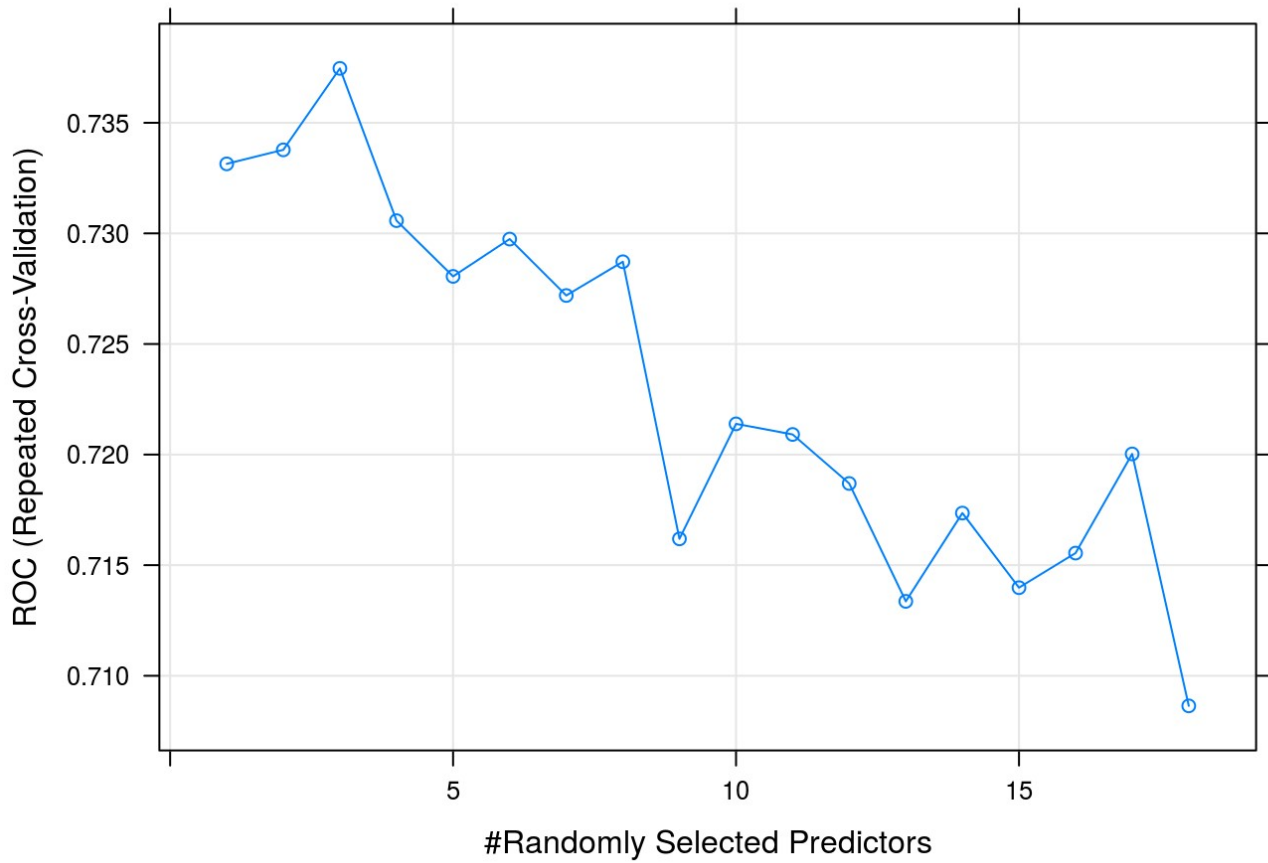

```
train.model.rf$bestTune
```

```
## mtry  
## 3 3
```

#### Confusion matrix for Random Forest model (with imputed data)

```
pred.cm.rf=predict(train.model.rf,dataset.x.ts)  
cm.rf=confusionMatrix(pred.cm.rf,dataset.y.ts,positive="Dead")  
cm.rf
```

```
## Confusion Matrix and Statistics
##
##           Reference
## Prediction Alive Dead
##      Alive 2487  39
##      Dead  138  11
##
##           Accuracy : 0.9338
##           95% CI : (0.9237, 0.943)
##      No Information Rate : 0.9813
##      P-Value [Acc > NIR] : 1
##
##           Kappa : 0.0849
##      McNemar's Test P-Value : 1.757e-13
##
##           Sensitivity : 0.220000
##           Specificity : 0.947429
##      Pos Pred Value : 0.073826
##      Neg Pred Value : 0.984561
##           Prevalence : 0.018692
##      Detection Rate : 0.004112
##      Detection Prevalence : 0.055701
##      Balanced Accuracy : 0.583714
##
##           'Positive' Class : Dead
##
```

### Elastic Net Model (with imputed data)

```
set.seed(197)
train.model.net=train(x=dataset.x.tr
                      ,y=dataset.y.tr
                      ,method="glmnet"
                      ,trControl=ctrl
                      ,tuneGrid=expand.grid(.alpha = seq(.05, 1, length = 15),
                                             .lambda = c((1:5)/10))
                      ,metric="ROC"
                      ,family = "binomial"
                      ,preProcess=c(method="bagImpute"))
)
plot(train.model.net)
```

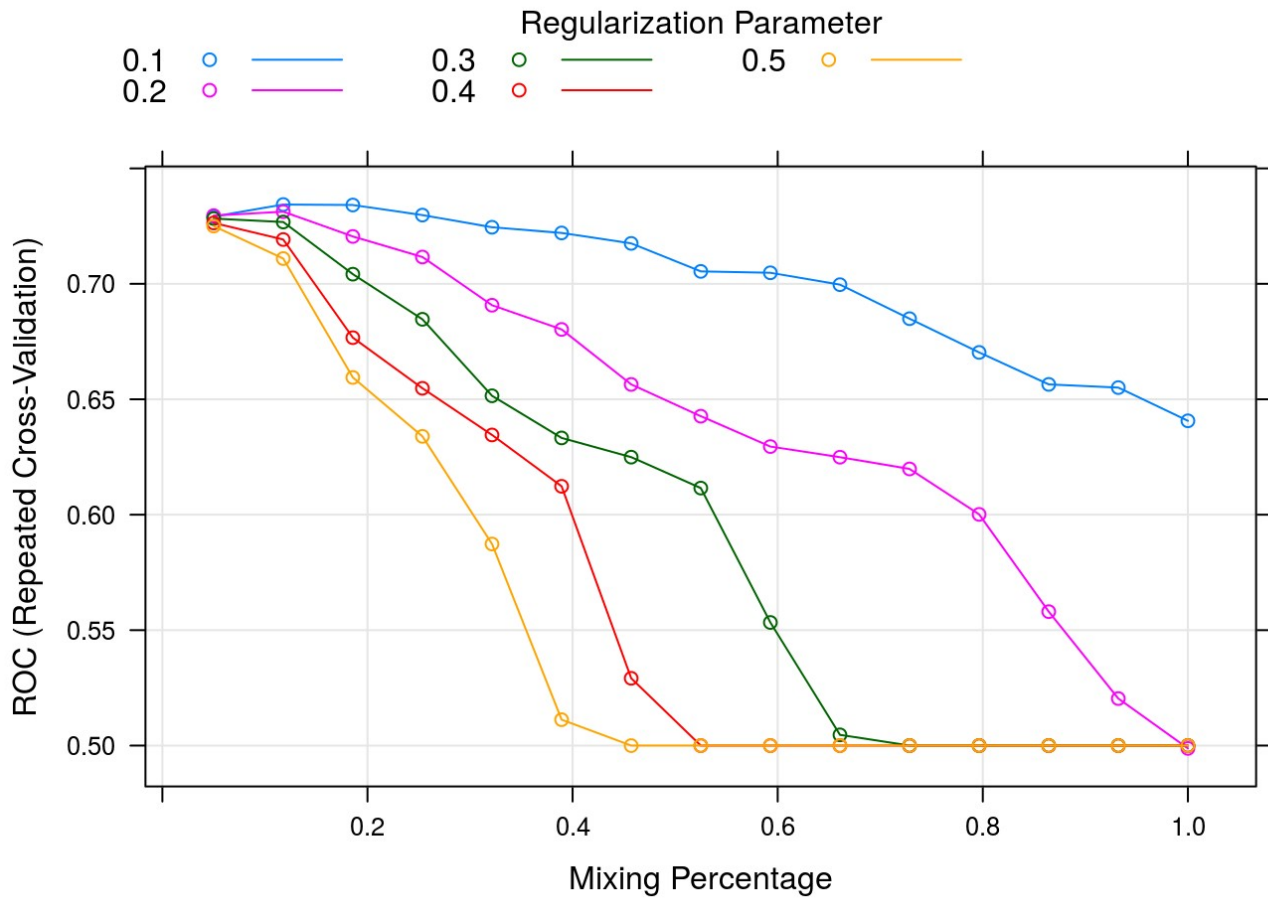

```
train.model.net$bestTune
```

```
##      alpha lambda
## 6 0.1178571    0.1
```

Confusion matrix for Elastic-Net model (with imputed data)

```
pred.cm.net=predict(train.model.net,dataset.x.ts)
cm.net=confusionMatrix(pred.cm.net,dataset.y.ts,positive="Dead")
cm.net
```

```
## Confusion Matrix and Statistics
##
##           Reference
## Prediction Alive Dead
##      Alive 1986  20
##      Dead  639  30
##
##           Accuracy : 0.7536
##           95% CI : (0.7369, 0.7699)
##      No Information Rate : 0.9813
##      P-Value [Acc > NIR] : 1
##
##           Kappa : 0.0504
##      McNemar's Test P-Value : <2e-16
##
##           Sensitivity : 0.60000
##           Specificity : 0.75657
##      Pos Pred Value : 0.04484
##      Neg Pred Value : 0.99003
##           Prevalence : 0.01869
##      Detection Rate : 0.01121
##      Detection Prevalence : 0.25009
##      Balanced Accuracy : 0.67829
##
##           'Positive' Class : Dead
##
```

### 3. AUC ROC curves

```
library (pROC)
```

```
pred.pls=predict(train.model.pls,dataset.x.ts,type="prob")
pred.rf=predict(train.model.rf,dataset.x.ts,type="prob")
pred.svm=predict(train.model.svm,dataset.x.ts,type="prob")
pred.net=predict(train.model.net,dataset.x.ts,type="prob")
pred.log=predict(train.model.log,dataset.x.ts,type="prob")
```

```
roc(predictor=pred.rf$Dead,response=dataset.y.ts,levels=rev(levels(dataset.y.ts)),
ci=T,plot=T,xlab="1 - Specificity")
```

```
##
## Call:
## roc.default(response = dataset.y.ts, predictor = pred.rf$Dead, levels = rev
## (levels(dataset.y.ts)), ci = T, plot = T, xlab = "1 - Specificity")
##
## Data: pred.rf$Dead in 50 controls (dataset.y.ts Dead) > 2625 cases (dataset.y.t
## s Alive).
## Area under the curve: 0.7961
## 95% CI: 0.742-0.8502 (DeLong)
```

```

rf.roc=roc(predictor=pred.rf$Dead, response=dataset.y.ts, levels=rev(levels(dataset.y.ts)), ci=T, plot=T, add=T, col="#0000FF", xlim=c(0,1), main="ROC curves plotting performance of different models")
pls.roc=roc(predictor=pred.pls$Dead, response=dataset.y.ts, levels=rev(levels(dataset.y.ts)), ci=T, plot=T, add=T, col="#CD0000")
log.roc=roc(predictor=pred.log$Dead, response=dataset.y.ts, levels=rev(levels(dataset.y.ts)), ci=T, plot=T, add=T, col="#000000")
svm.roc=roc(predictor=pred.svm$Dead, response=dataset.y.ts, levels=rev(levels(dataset.y.ts)), ci=T, plot=T, add=T, col="#FFFF00")
net.roc=roc(predictor=pred.net$Dead, response=dataset.y.ts, levels=rev(levels(dataset.y.ts)), ci=T, plot=T, add=T, col="#7CFC00")

legend('bottomright', c("AUC Results",
  paste0("RF Model=", round(rf.roc$auc[1], 3)),
  paste0("PLS-DA Model=", round(pls.roc$auc[1], 3)),
  paste0("Logistic Model=", round(log.roc$auc[1], 3)),
  paste0("Elastic-Net Model=", round(net.roc$auc[1], 3)),
  paste0("Linear Kernel SVM Model=", round(svm.roc$auc[1], 3))),
  lty = c(1,1,1,1,1), col=c('#FFFFFF', '#0000FF', '#CD0000', '#000000', '#FFFF00', '#7CFC00'))

```

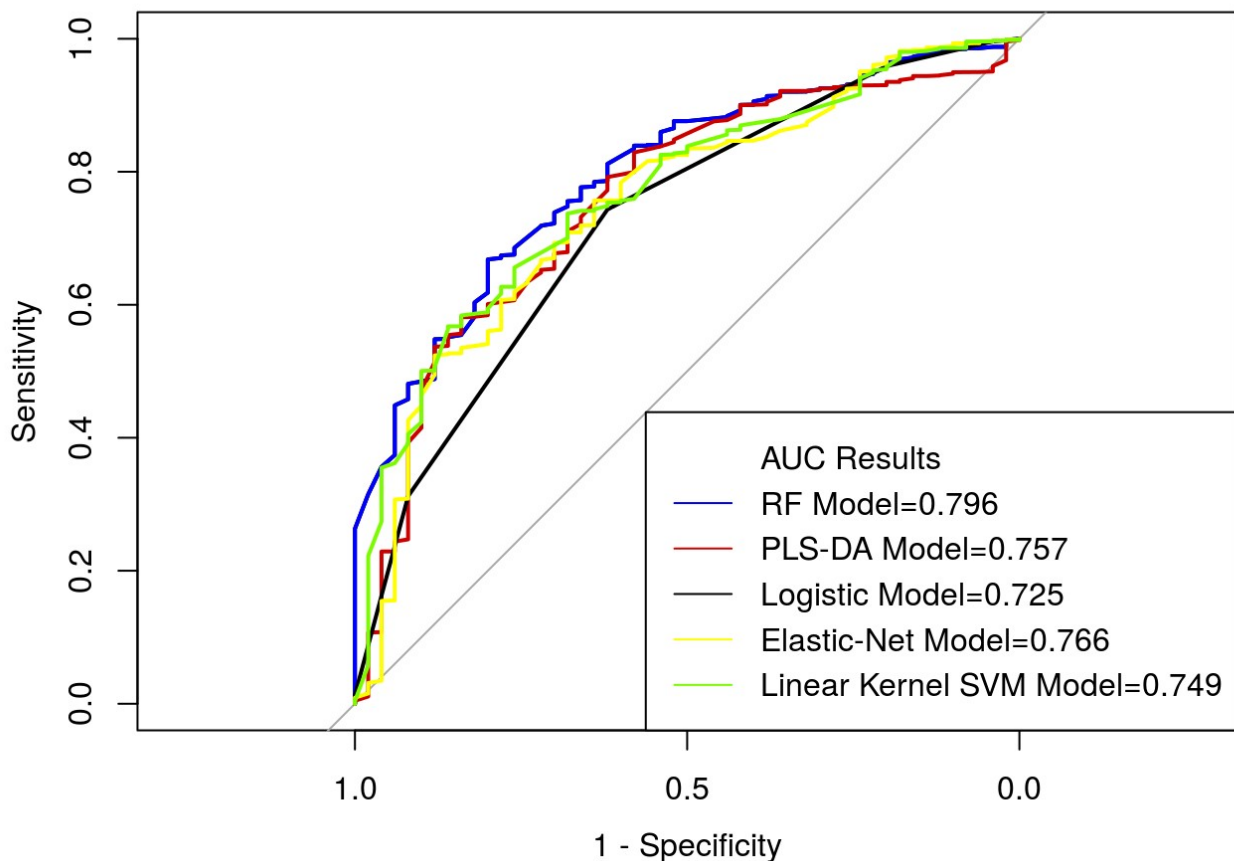

DeLong's test for two correlated ROC curves

```
log.rf.test=roc.test(log.roc,rf.roc)
log.pls.test=roc.test(log.roc,pls.roc)
log.svm.test=roc.test(log.roc,svm.roc)
log.net.test=roc.test(log.roc,net.roc)

p.test.df=data.frame("Model Type"=c("Random Forest",
                                     "PLS-DA",
                                     "Linear Kernel SVM",
                                     "Elastic-Net"),
                    "P-Value"=c(round(log.rf.test$p.value,3),
                                 round(log.pls.test$p.value,3),
                                 round(log.svm.test$p.value,3),
                                 round(log.net.test$p.value,3)))

kable(p.test.df)
```

| Model.Type        | P.Value |
|-------------------|---------|
| Random Forest     | 0.008   |
| PLS-DA            | 0.064   |
| Linear Kernel SVM | 0.350   |
| Elastic-Net       | 0.078   |

```
auc.ci.df=data.frame("Model Type"=c("Logistic Model",
                                     "Random Forest",
                                     "PLS-DA",
                                     "Linear Kernel SVM",
                                     "Elastic-Net"),
                    "AUC"= c(round(log.roc$auc[1],3), round(rf.roc$auc[1],3), round
(pls.roc$auc[1],3),
                                 round(svm.roc$auc[1],3), round(net.roc$auc[1],3)),
                    "95CI"=c(paste0(round(log.roc$ci,3)[1],"-",round(log.roc$ci,3
) [3]),
                                 paste0(round(rf.roc$ci,3)[1],"-",round(rf.roc$ci,3)[
3]),
                                 paste0(round(pls.roc$ci,3)[1],"-",round(pls.roc$ci,3
) [3]),
                                 paste0(round(svm.roc$ci,3)[1],"-",round(svm.roc$ci,3
) [3]),
                                 paste0(round(net.roc$ci,3)[1],"-",round(net.roc$ci,3
) [3])))
kable(auc.ci.df)
```

| Model.Type        | AUC   | X95CI       |
|-------------------|-------|-------------|
| Logistic Model    | 0.725 | 0.658-0.792 |
| Random Forest     | 0.796 | 0.742-0.85  |
| PLS-DA            | 0.757 | 0.691-0.823 |
| Linear Kernel SVM | 0.749 | 0.68-0.817  |

**Model.Type**

**AUC X95CI**

Elastic-Net

0.766 0.705-0.827

## 4. Variable Importance of different models

### 4.1 Variable Importance Plot - PLS-DA

```
vic.pls=varImp(train.model.pls,useModel=T,scale=F)
ggplot(vic.pls)
```

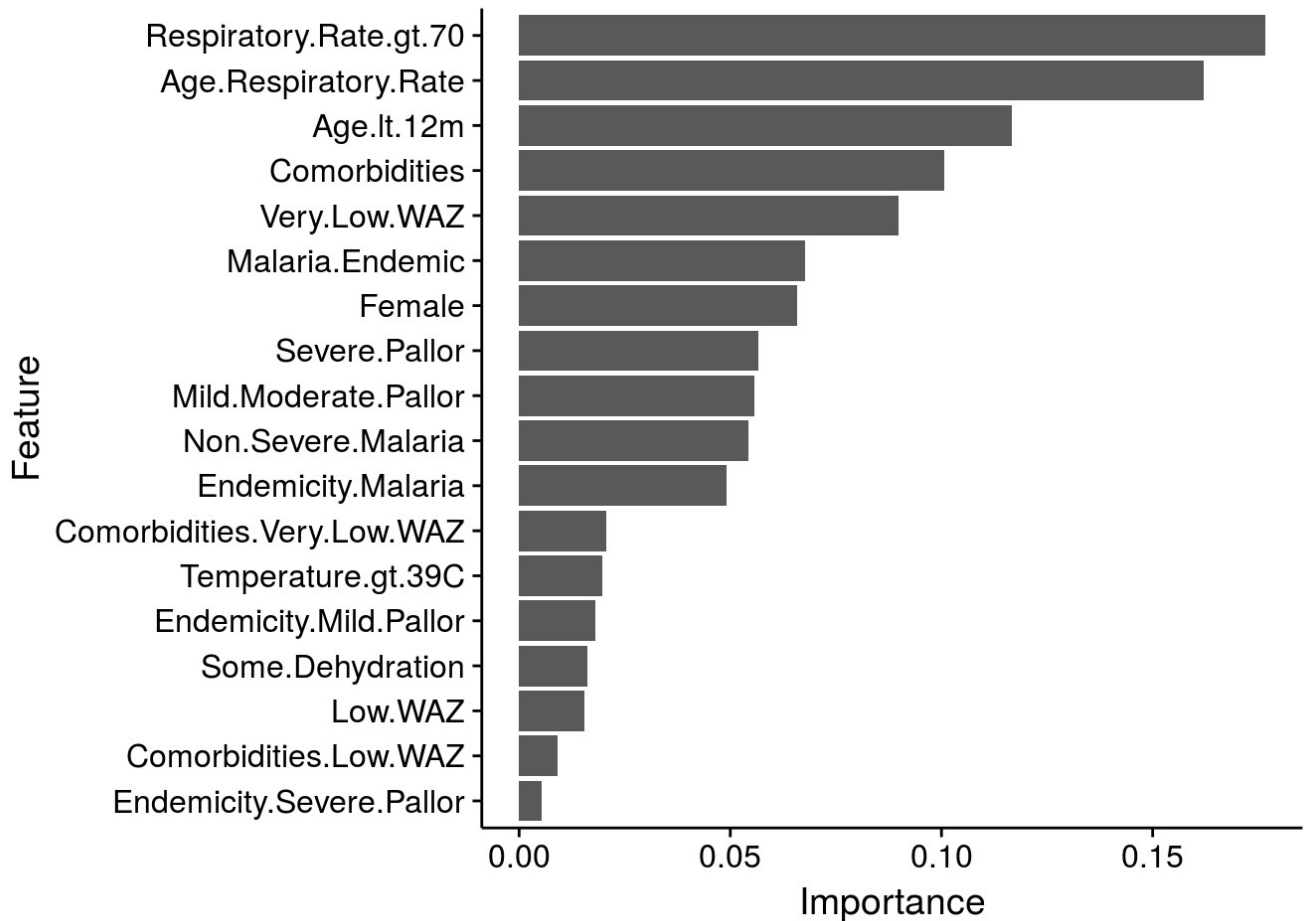

### 4.2 Variable Importance Plot - Random Forest

```
vic.rf=varImp(train.model.rf,useModel=T,scale=F)
ggplot(vic.rf)
```



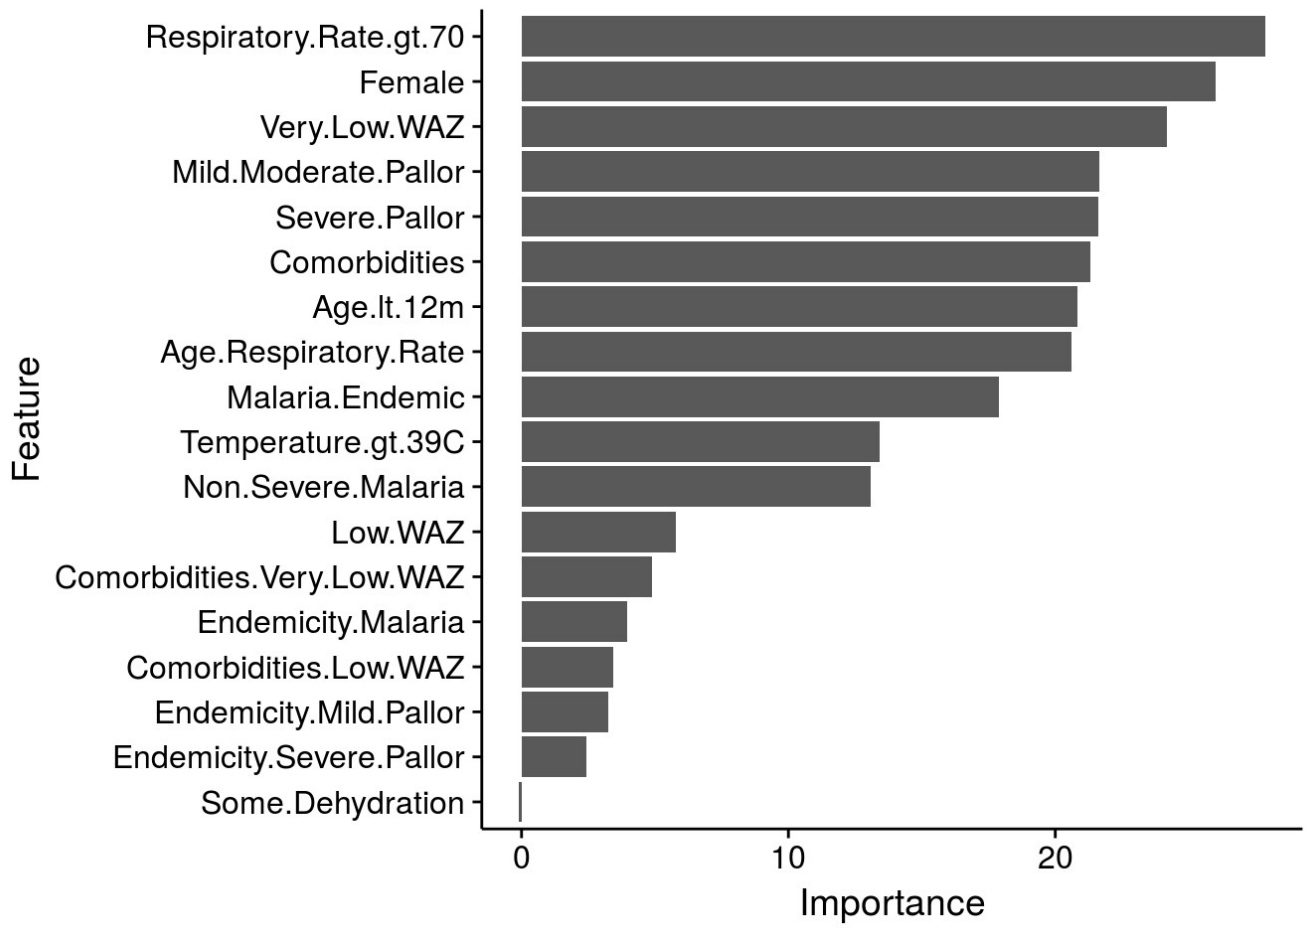

#### 4.3 Variable Importance Plot - SVM

```
vic.svm=varImp(train.model.svm,useModel=T,scale=F)  
ggplot(vic.svm)
```

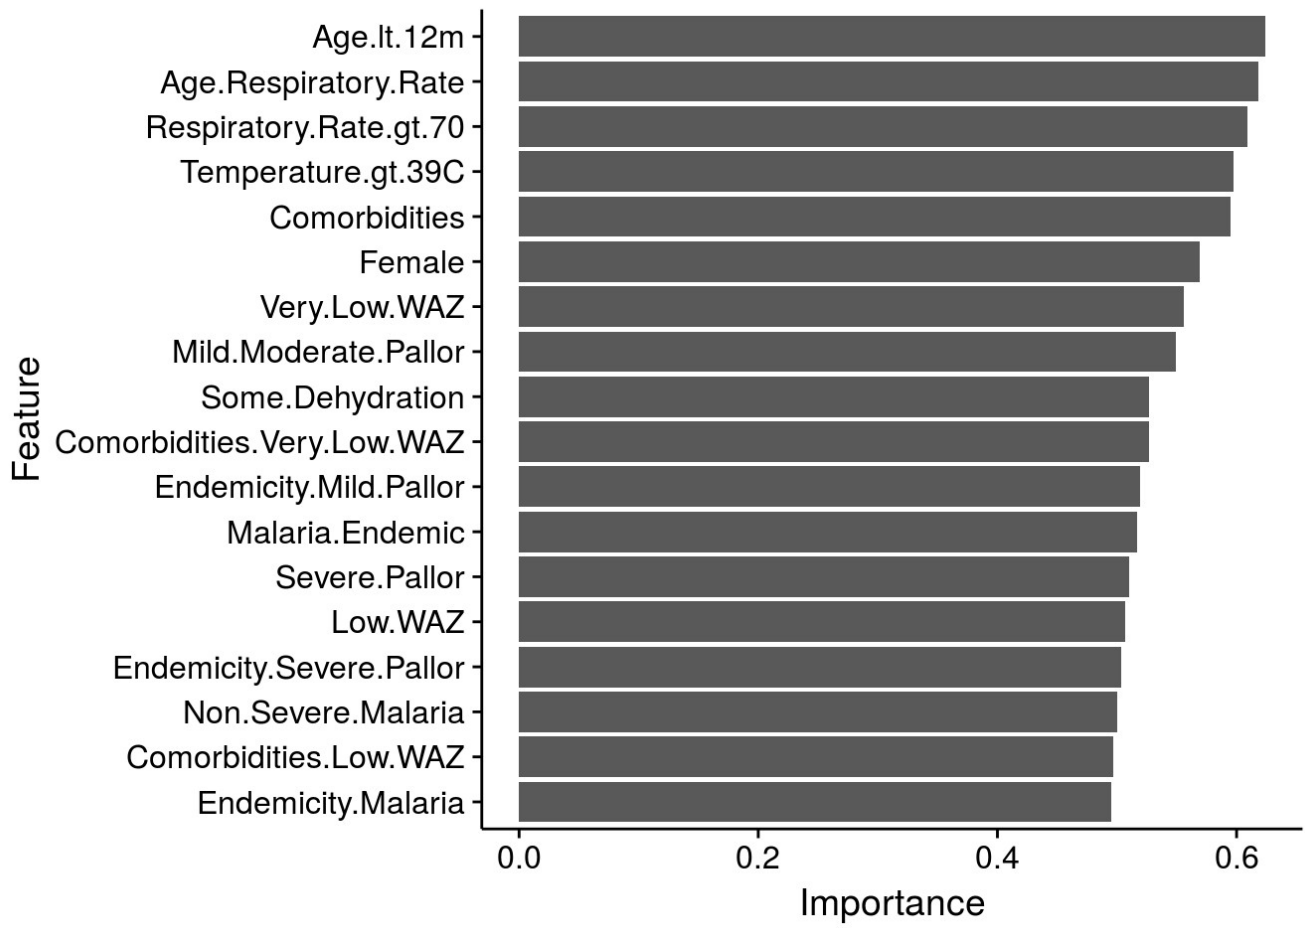

#### 4.4 Variable Importance Plot - Elastic Net

```
vic.net=varImp(train.model.net,useModel=T,scale=F)  
ggplot(vic.net)
```

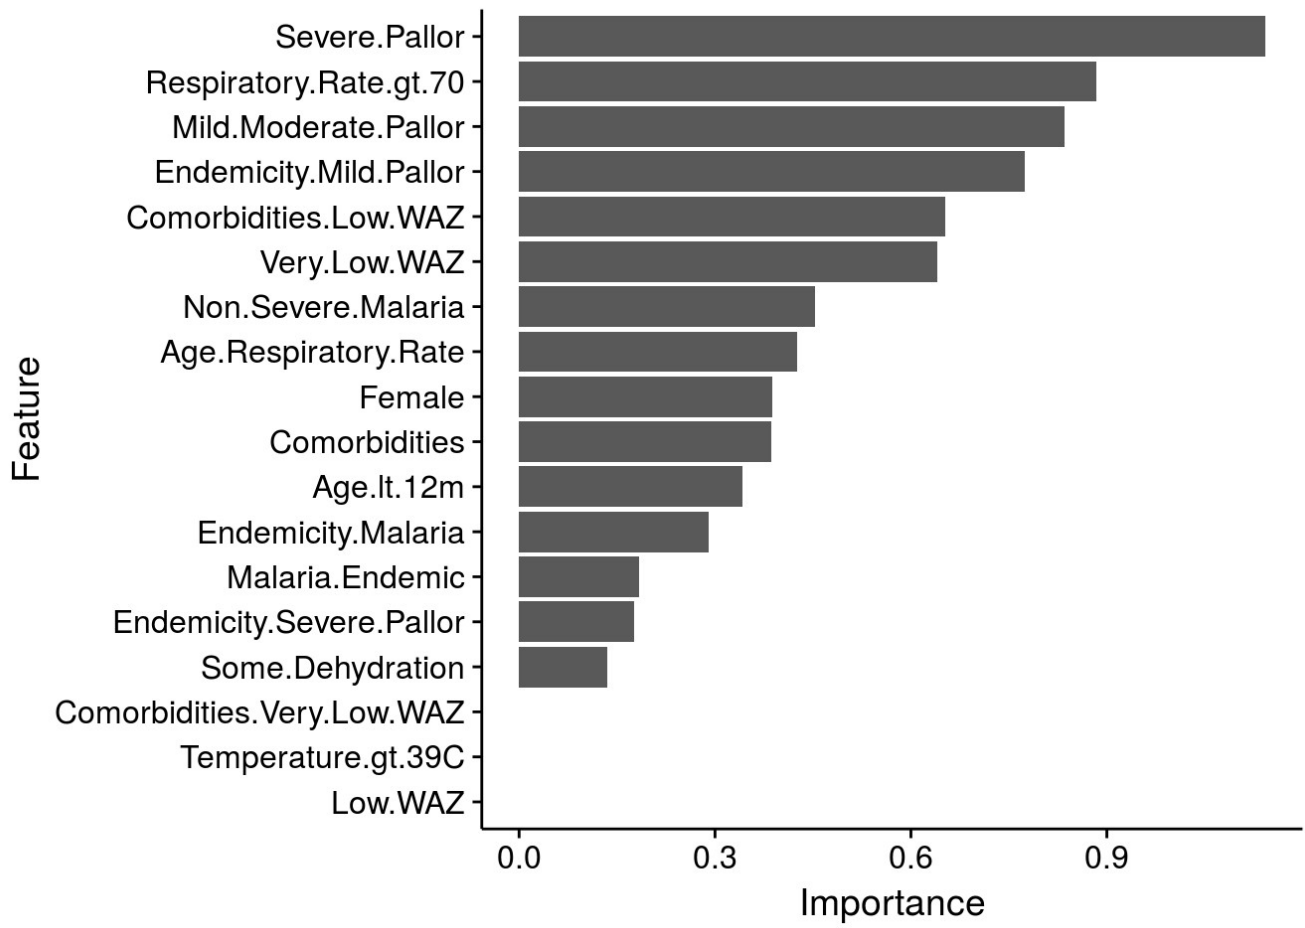

#### 4.5 Variable Importance Plot - Logistic Model

```
vic.log=varImp(train.model.log,useModel=T,scale=F)  
ggplot(vic.log)
```



## 5. Decision curve analysis

```

load(file="pneumonia.test.rda")

pneumonia.org = copy(pneumonia)
pneumonia.org=pneumonia.org[,copy(.SD),.SDcols=c("indrawing","tachypnoea","high.fever",
"female","mal.end","age.lt.12m","cormobidity","pneum.severity.Non.severe","pneum.severity.Severe",
"pneum.severity.Very.Severe","malaria.Non.severe.malaria","pallor.Mild.Moderate",
"pallor.Severe","dehydration.Some.dehydration","waz.Moderate",
"waz.Severe","malnutrition.Moderate","mortality")]

pneumonia.org[,cormobidity:=cormobidity-1]
pneumonia.org[,cormobidity:=ifelse(cormobidity > 0, 1, 0)]

pneumonia.org[,`WHO None Severe`=0]
pneumonia.org[pneum.severity.Non.severe==1| pneum.severity.Severe==1,`WHO None Severe`=1]
pneumonia.org[,pneum.severity.Non.severe:=NULL]
pneumonia.org[,pneum.severity.Severe:=NULL]

setnames(pneumonia.org,
         c("indrawing","age.lt.12m","female","high.fever","cormobidity","pneum.severity.Very.Severe",
"mal.end","tachypnoea","waz.Moderate","waz.Severe","dehydration.Some.dehydration",
"mortality","malaria.Non.severe.malaria","pallor.Mild.Moderate",
"pallor.Severe","malnutrition.Moderate"),
         c("Indrawing","Age < 12m","Female","Temperature ≥39 C","Presence of Cormobidity",
"Severe Pneumonia","Malaria Endemic","Respiratory Rate ≥70/min","Low WAZ",
"Very Low WAZ","Some Dehydration","Mortality","Non severe Malaria","Mild/Moderate Pallor",
"Severe Pallor","Moderate Malnutrition"))

pneumonia.dca=copy(pneumonia.org)
pneumonia.dca=pneumonia.dca[,copy(.SD),.SDcols=c("Indrawing","Age < 12m","Female",
"Respiratory Rate ≥70/min","Very Low WAZ","Mild/Moderate Pallor","Presence of Cormobidity",
"WHO None Severe","Severe Pneumonia","Mortality")]
pneumonia.dca=pneumonia.dca[complete.cases(pneumonia.dca),copy(.SD)]

set.seed(197)
curr.dec.model=decision_curve(Mortality~ `Severe Pneumonia`,
                             data = pneumonia.dca,
                             thresholds = seq(0, .15, by = .0005),
                             bootstraps = 1000)

set.seed(197)
risk.grp.model <- decision_curve(Mortality ~ `WHO None Severe`+`Respiratory Rate ≥
70/min`+
                                `Age < 12m` + `Very Low WAZ`,
                                data = pneumonia.dca,
                                thresholds = seq(0, .15, by = .0005),
                                bootstraps = 1000)

plot_decision_curve(list(curr.dec.model,risk.grp.model),
                    curve.names = c("Severe Pneumonia",
                                     "*Age <12m + Resp Rate ≥70\n+Very Low WAZ"),
                    confidence.intervals = FALSE,
                    standardize = FALSE,
                    ylim = c(-0.005, 0.035),

```

```
xlim= c(0, 0.15),
cost.benefit.axis = FALSE,
xaxt="n",
main="Decision Curve Analysis Graph")
```

```
## Note: When multiple decision curves are plotted, decision curves for 'All' are
calculated using the first DecisionCurve in the list provided.
```

```
axis(1,at = seq(0, 0.15, by = 0.01),las=2)
abline(h=seq(0, 0.15, by = 0.005), v=seq(0, 0.15, by = 0.005), col="gray", lty=3)
```

## Decision Curve Analysis Graph

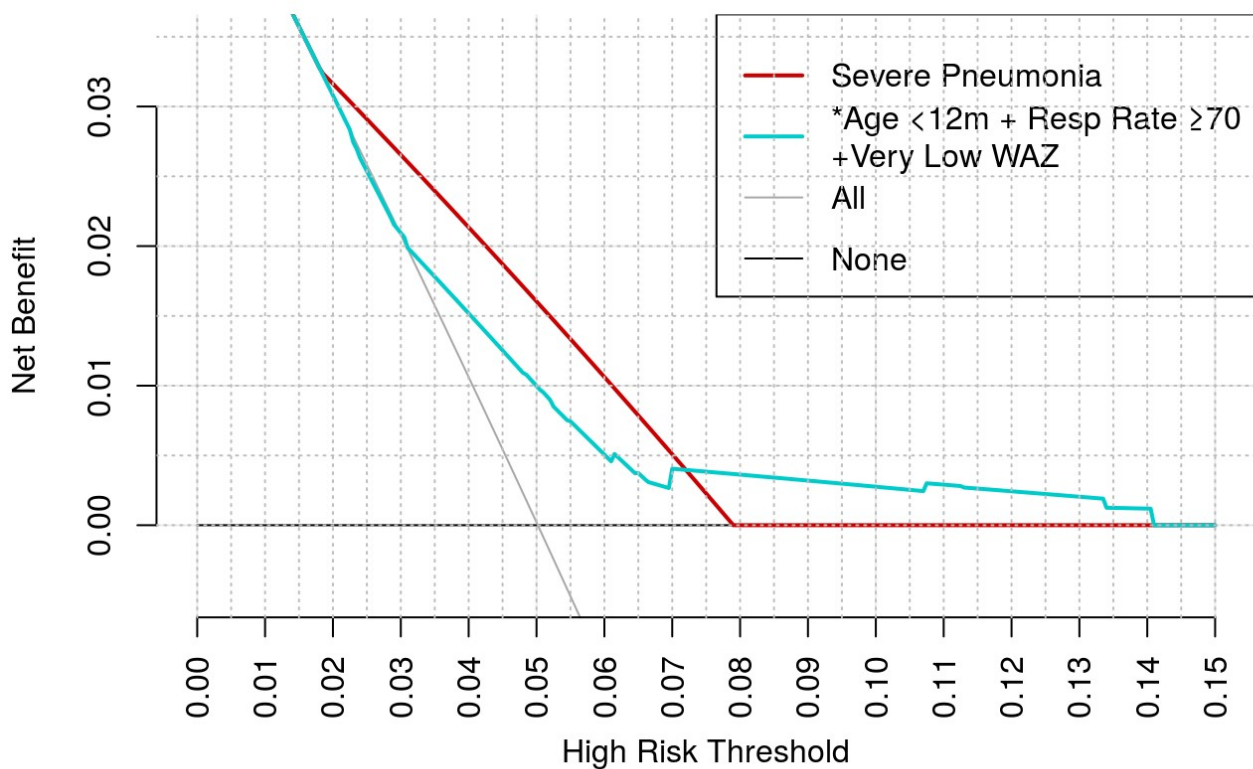

## Decision impact

```
#plot the clinical impact
plot_clinical_impact(risk.grp.model, xlim = c(0, 0.12), col = c("orange", "red"),
population.size = 100,
cost.benefit.axis = FALSE,
main="Clinical Impact Graph")
```

### Clinical Impact Graph

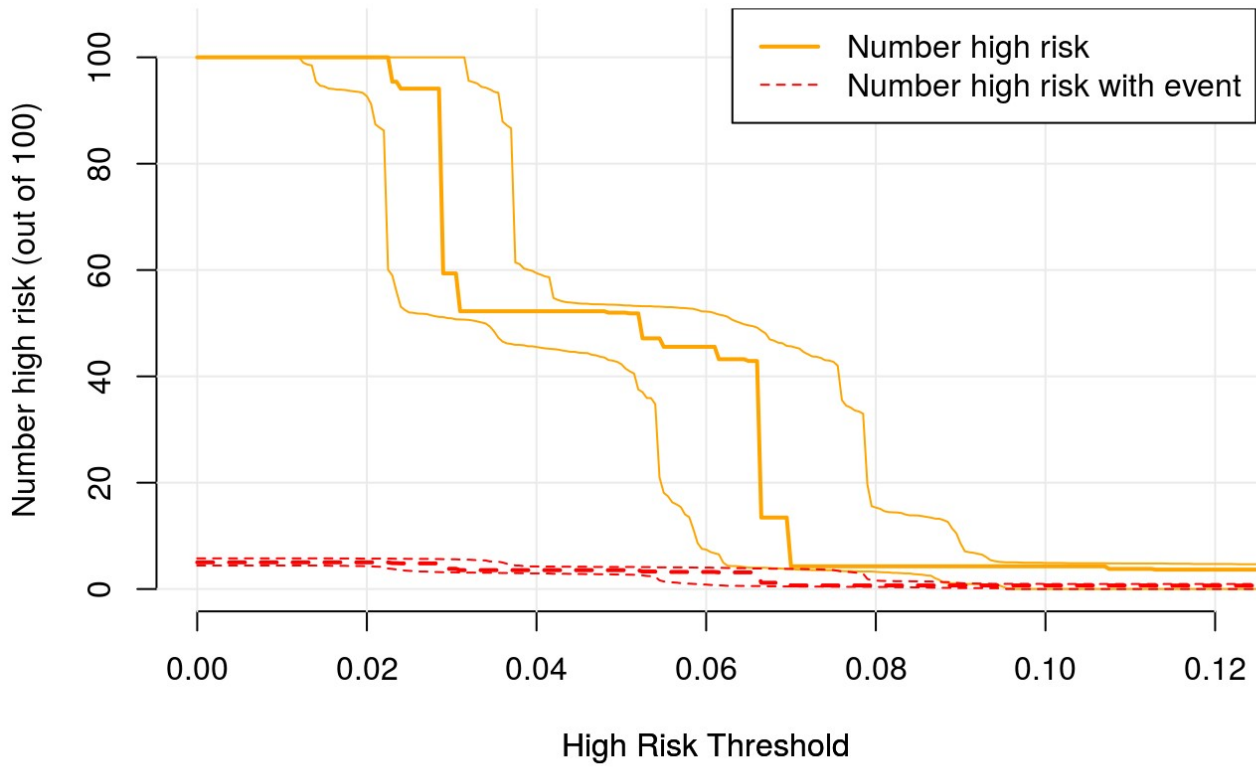

## 6. Sensitivity analysis

### 6.1 Based on different classification criterion

#### 6.1.1 Penicillin Monotherapy

```

pneumonia= pneumonia.copy[,copy(.SD)]
suppressMessages({

  pneumonia[,Age.Respiratory.Rate:=ifelse(!is.na(Age.lt.12m) & !is.na(Respiratory.
Rate.gt.70),0,NA_integer_)]
  pneumonia[Age.Respiratory.Rate==0 & Age.lt.12m==1 & Respiratory.Rate.gt.70==1,Ag
e.Respiratory.Rate:=1]

  pneumonia[,Comorbidities.Low.WAZ:=ifelse(!is.na(Comorbidities) & !is.na(Low.WAZ)
,0,NA_integer_)]
  pneumonia[Comorbidities.Low.WAZ==0 & Comorbidities==1 & Low.WAZ==1,Comorbidities
.Low.WAZ:=1]

  pneumonia[,Comorbidities.Very.Low.WAZ:=ifelse(!is.na(Comorbidities) & !is.na(Ver
y.Low.WAZ),0,NA_integer_)]
  pneumonia[Comorbidities.Very.Low.WAZ==0 & Comorbidities==1 & Very.Low.WAZ==1,Com
orbidities.Very.Low.WAZ:=1]

  pneumonia[,Endemicity.Malaria:=ifelse(!is.na(Malaria.Endemic) & !is.na(Non.Sever
e.Malaria),0,NA_integer_)]
  pneumonia[Endemicity.Malaria==0 & Malaria.Endemic==1 & Non.Severe.Malaria==1,End
emicity.Malaria:=1]

  pneumonia[,Endemicity.Mild.Pallor:=ifelse(!is.na(Malaria.Endemic) & !is.na(Mild.
Moderate.Pallor),0,NA_integer_)]
  pneumonia[Endemicity.Mild.Pallor==0 & Malaria.Endemic==1 & Mild.Moderate.Pallor=
=1,Endemicity.Mild.Pallor:=1]

  pneumonia[,Endemicity.Severe.Pallor:=ifelse(!is.na(Malaria.Endemic) & !is.na(Sev
ere.Pallor),0,NA_integer_)]
  pneumonia[Endemicity.Severe.Pallor==0 & Malaria.Endemic==1 & Severe.Pallor==1,En
demicity.Severe.Pallor:=1]

  setcolororder(pneumonia,c("Age.lt.12m","Female","Respiratory.Rate.gt.70","Temperat
ure.gt.39C","Severe.Pneumonia","Mild.Moderate.Pallor","Severe.Pallor","Some.Dehydr
ation","Low.WAZ","Very.Low.WAZ","Malaria.Endemic","Non.Severe.Malaria","Comorbidit
ies","Severity.Treatment","Clinician.Diagnosis","None.Severe","Age.Respiratory.Rat
e","Comorbidities.Very.Low.WAZ","Comorbidities.Low.WAZ","Endemicity.Malaria","Ende
micity.Mild.Pallor","Endemicity.Severe.Pallor","Mortality"))
})

#Based on Penicillin Monotherapy
pneumonia.pres=pneumonia[Severity.Treatment==1,copy(.SD)]
pneumonia.pres[,Clinician.Diagnosis:=NULL]
pneumonia.pres[,Severity.Treatment:=NULL]
pneumonia.pres[,None.Severe:=NULL]
pneumonia.pres[,Severe.Pneumonia:=NULL]

dataset=pneumonia.pres[!is.na(Mortality),copy(.SD)]
dataset$Mortality=factor(dataset$Mortality,levels=c(0,1),labels=c("Alive","Dead"))

paste0(round(prop.table(table(dataset$Mortality))*100,2)," %")

```



```
## [1] "99.26 %" "0.74 %"
```

```
dataset=as.data.frame(dataset)

set.seed(197)
train.ids=sample(seq(nrow(dataset)), round(nrow(dataset)*0.67), replace=F)

col.len=length(dataset)

dataset.x=dataset[,1:(col.len-1)]
dataset.y=dataset[,col.len]

dataset.x.tr.pres=dataset.x[train.ids,]
dataset.y.tr.pres=dataset.y[train.ids]

dataset.x.ts.pres=dataset.x[-train.ids,]
dataset.y.ts.pres=dataset.y[-train.ids]

tune.len=length(dataset.x.tr.pres)

set.seed(197)
train.model.pls.pres=train(x=dataset.x.tr.pres
                           ,y=dataset.y.tr.pres
                           ,method="pls"
                           ,trControl=ctrl
                           ,tuneLength = tune.len
                           ,importance=T
                           ,probMethod="Bayes"
                           ,metric="ROC"
                           ,preProc=c(method="bagImpute")
)
```

### Confusion matrix for Penicillin Monotherapy model (with imputed data)

```
pred.pls.pres=predict(train.model.pls.pres, dataset.x.ts.pres)
cm.pls.pres=confusionMatrix(pred.pls.pres, dataset.y.ts.pres, positive="Dead")
cm.pls.pres
```

```
## Confusion Matrix and Statistics
##
##           Reference
## Prediction Alive Dead
##   Alive   983    6
##   Dead   212    3
##
##           Accuracy : 0.8189
##           95% CI   : (0.796, 0.8403)
##   No Information Rate : 0.9925
##   P-Value [Acc > NIR] : 1
##
##           Kappa   : 0.0126
##   McNemar's Test P-Value : <2e-16
##
##           Sensitivity : 0.333333
##           Specificity : 0.822594
##   Pos Pred Value   : 0.013953
##   Neg Pred Value   : 0.993933
##   Prevalence       : 0.007475
##   Detection Rate   : 0.002492
##   Detection Prevalence : 0.178571
##   Balanced Accuracy : 0.577964
##
##           'Positive' Class : Dead
##
```

### 6.1.2 Clinician Diagnosis

```
#Based on Clinician Diagnosis
pneumonia.cd=pneumonia[Clinician.Diagnosis==1,copy(.SD)]
pneumonia.cd[,Clinician.Diagnosis:=NULL]
pneumonia.cd[,Severity.Treatment:=NULL]
pneumonia.cd[,None.Severe:=NULL]
pneumonia.cd[,Severe.Pneumonia:=NULL]

dataset=pneumonia.cd[!is.na(Mortality),copy(.SD)]
dataset$Mortality=factor(dataset$Mortality,levels=c(0,1),labels=c("Alive","Dead"))

paste0(round(prop.table(table(dataset$Mortality))*100,2)," %")
```

```
## [1] "97.64 %" "2.36 %"
```

```
dataset.comp.cd=copy (dataset)
dataset=as.data.frame (dataset)

set.seed (197)
train.ids=sample (seq (nrow (dataset)) , round (nrow (dataset) *0.67) , replace=F)

col.len=length (dataset)

dataset.x=dataset [, 1:(col.len-1)]
dataset.y=dataset [, col.len]

dataset.x.tr.cd=dataset.x[train.ids,]
dataset.y.tr.cd=dataset.y[train.ids]

dataset.x.ts.cd=dataset.x[-train.ids,]
dataset.y.ts.cd=dataset.y[-train.ids]

tune.len=length (dataset.x.tr.cd)

set.seed (197)
train.model.pls.cd=train (x=dataset.x.tr.cd
                        ,y=dataset.y.tr.cd
                        ,method="pls"
                        ,trControl=ctrl
                        ,tuneLength = tune.len
                        ,importance=T
                        ,probMethod="Bayes"
                        ,metric="ROC"
                        ,preProc=c (method="bagImpute")
)
```

### Confusion matrix for Clinician Diagnosis model (with imputed data)

```
pred.pls.cd=predict (train.model.pls.cd, dataset.x.ts.cd)
cm.pls.cd=confusionMatrix (pred.pls.cd, dataset.y.ts.cd, positive="Dead")
cm.pls.cd
```

```
## Confusion Matrix and Statistics
##
##           Reference
## Prediction Alive Dead
##   Alive  2565   32
##   Dead   704   49
##
##           Accuracy : 0.7803
##           95% CI   : (0.7659, 0.7942)
##   No Information Rate : 0.9758
##   P-Value [Acc > NIR] : 1
##
##           Kappa   : 0.0772
##   Mcnemar's Test P-Value : <2e-16
##
##           Sensitivity : 0.60494
##           Specificity : 0.78464
##   Pos Pred Value   : 0.06507
##   Neg Pred Value   : 0.98768
##   Prevalence       : 0.02418
##   Detection Rate   : 0.01463
##   Detection Prevalence : 0.22478
##   Balanced Accuracy : 0.69479
##
##           'Positive' Class : Dead
##
```

### 6.1.3 Ideal population

```
#Based on Ideal Population
pneumonia.idl=pneumonia[Severity.Treatment==1 & Clinician.Diagnosis==1 & None.Seve
re==1,copy(.SD)]
pneumonia.idl[,Clinician.Diagnosis:=NULL]
pneumonia.idl[,Severity.Treatment:=NULL]
pneumonia.idl[,None.Severe:=NULL]
pneumonia.idl[,Severe.Pneumonia:=NULL]

dataset=pneumonia.idl[!is.na(Mortality),copy(.SD)]
dataset$Mortality=factor(dataset$Mortality,levels=c(0,1),labels=c("Alive","Dead"))

paste0(round(prop.table(table(dataset$Mortality))*100,2)," %")

## [1] "99.27 %" "0.73 %"
```

```

dataset=as.data.frame(dataset)

set.seed(197)
train.ids=sample(seq(nrow(dataset)), round(nrow(dataset)*0.67), replace=F)

col.len=length(dataset)

dataset.x=dataset[,1:(col.len-1)]
dataset.y=dataset[,col.len]

dataset.x.tr.idl=dataset.x[train.ids,]
dataset.y.tr.idl=dataset.y[train.ids]

dataset.x.ts.idl=dataset.x[-train.ids,]
dataset.y.ts.idl=dataset.y[-train.ids]

tune.len=length(dataset.x.tr.idl)

set.seed(197)
train.model.pls.idl=train(x=dataset.x.tr.idl
                        ,y=dataset.y.tr.idl
                        ,method="pls"
                        ,trControl=ctrl
                        ,tuneLength = tune.len
                        ,importance=T
                        ,probMethod="Bayes"
                        ,metric="ROC"
                        ,preProc=c(method="bagImpute")
)

```

### Confusion matrix for Ideal population model (with imputed data)

```

pred.pls.idl=predict(train.model.pls.idl,dataset.x.ts.idl)
cm.pls.idl=confusionMatrix(pred.pls.idl,dataset.y.ts.idl,positive="Dead")
cm.pls.idl

```

```
## Confusion Matrix and Statistics
##
##           Reference
## Prediction Alive Dead
##   Alive   706    3
##   Dead   143    2
##
##           Accuracy : 0.829
##           95% CI   : (0.8021, 0.8537)
##   No Information Rate : 0.9941
##   P-Value [Acc > NIR] : 1
##
##           Kappa   : 0.0155
##   Mcnemar's Test P-Value : <2e-16
##
##           Sensitivity : 0.400000
##           Specificity : 0.831567
##   Pos Pred Value   : 0.013793
##   Neg Pred Value   : 0.995769
##   Prevalence       : 0.005855
##   Detection Rate   : 0.002342
##   Detection Prevalence : 0.169789
##   Balanced Accuracy : 0.615783
##
##           'Positive' Class : Dead
##
```

### Getting the AUC and DeLong's test for the ROC curves

```
pred.cd=predict(train.model.pls.cd,dataset.x.ts.cd,type="prob")
pred.press=predict(train.model.pls.pres,dataset.x.ts.pres,type="prob")
pred.idl=predict(train.model.pls.idl,dataset.x.ts.idl,type="prob")

roc(predictor=pred.pls$Dead,response=dataset.y.ts,levels=rev(levels(dataset.y.ts))
,ci=T,plot=T,xlab="1 - Specificity")
```

```
##
## Call:
## roc.default(response = dataset.y.ts, predictor = pred.pls$Dead, levels = re
v(levels(dataset.y.ts)), ci = T, plot = T, xlab = "1 - Specificity")
##
## Data: pred.pls$Dead in 50 controls (dataset.y.ts Dead) > 2625 cases (dataset.y.
ts Alive).
## Area under the curve: 0.757
## 95% CI: 0.6909-0.8231 (DeLong)
```

```

pls.roc=roc(predictor=pred.pls$Dead, response=dataset.y.ts, levels=rev(levels(dataset.y.ts)), ci=T, plot=T, add=T, col="#0000FF", xlim=c(0,1),
            , main="ROC curves plotting performance of pneumonia criteria")
pls.cd.roc=roc(predictor=pred.cd$Dead, response=dataset.y.ts.cd, levels=rev(levels(dataset.y.ts.cd)), ci=T, plot=T, add=T, col="#CD0000")
pls.press.roc=roc(predictor=pred.press$Dead, response=dataset.y.ts.pres, levels=rev(levels(dataset.y.ts.pres)), ci=T, plot=T, add=T, col="#000000")
pls.idl.roc=roc(predictor=pred.idl$Dead, response=dataset.y.ts.idl, levels=rev(levels(dataset.y.ts.idl)), ci=T, plot=T, add=T, col="#FFFF00")

legend('bottomright', c("AUC Results",
                        paste0("WHO criteria=", round(pls.roc$auc[1], 3)),
                        paste0("Clinician Criteria=", round(pls.cd.roc$auc[1], 3)),
                        paste0("Penicillin Criteria=", round(pls.press.roc$auc[1], 3)),
                        ,
                        paste0("Ideal Criteria=", round(pls.idl.roc$auc[1], 3))),
      lty = c(1,1,1,1,1), col=c('#FFFFFF', '#0000FF', '#CD0000', '#000000', '#FFFF00'))
    )

```

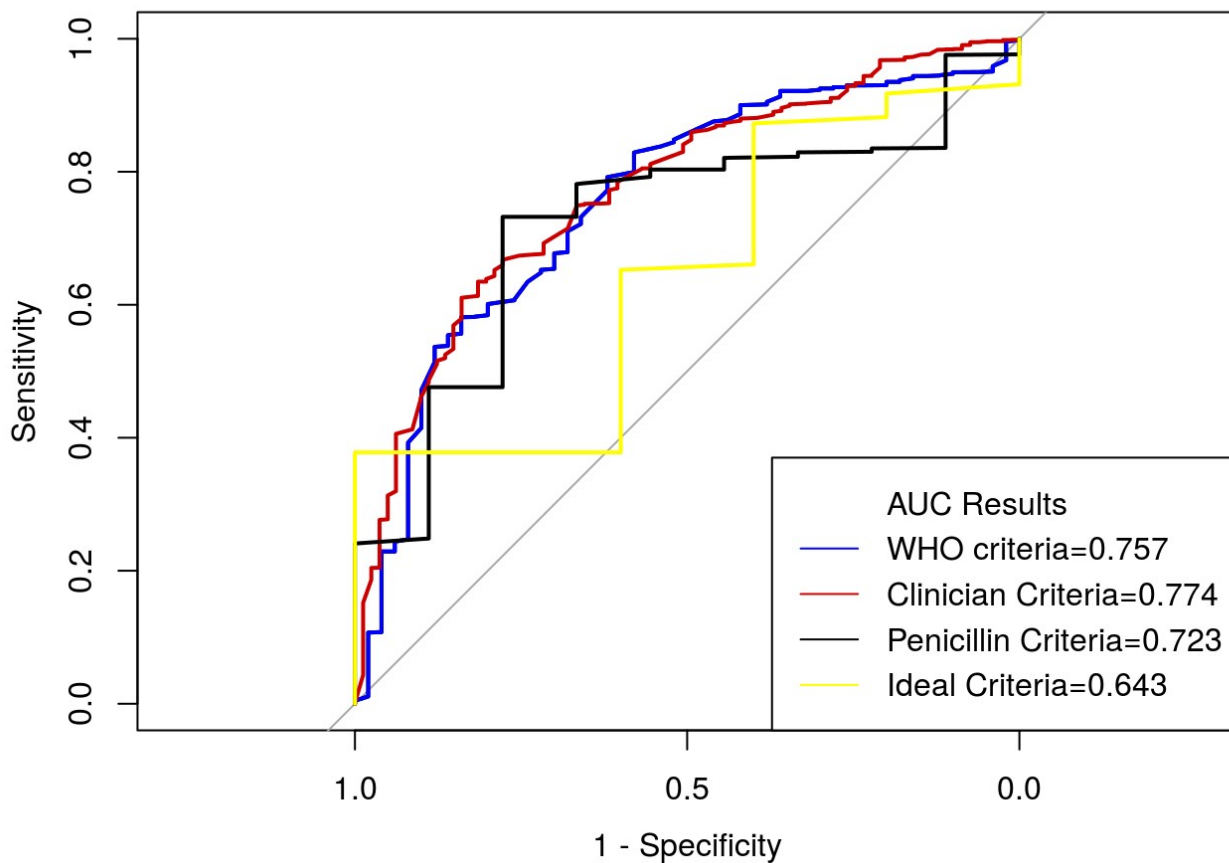

```

who.cd.test=roc.test(pls.roc,pls.cd.roc)
who.press.test=roc.test(pls.roc,pls.press.roc)
who.idl.test=roc.test(pls.roc,pls.idl.roc)

p.test.sens.df=data.frame("Pneumonia Classification Criteria"=c("Clinician Diagnos
is Criteria","Penicillin Monotherapy Criteria","Ideal population"),"P-Value"=c(rou
nd(who.cd.test$p.value,3),round(who.press.test$p.value,3),round(who.idl.test$p.val
ue,3)))

kable(p.test.sens.df)

```

| <b>Pneumonia.Classification.Criteria</b> | <b>P.Value</b> |
|------------------------------------------|----------------|
| Clinician Diagnosis Criteria             | 0.691          |
| Penicillin Monotherapy Criteria          | 0.679          |
| Ideal population                         | 0.352          |

```

auc.crit.df=data.frame("Model Type"=c("WHO criteria",
      "Clinician Criteria",
      "Penicillin Criteria",
      "Ideal Criteria"),
      "AUC"= c(round(pls.roc$auc[1],3),round(pls.cd.roc$auc[1],3),r
ound(pls.press.roc$auc[1],3),
      round(pls.idl.roc$auc[1],3)),
      "95% CI"=c(paste0(round(pls.roc$ci,3)[1],"-",round(pls.roc$ci
,3)[3]),
      paste0(round(pls.cd.roc$ci,3)[1],"-",round(pls.cd.ro
c$ci,3)[3]),
      paste0(round(pls.press.roc$ci,3)[1],"-",round(pls.pr
ess.roc$ci,3)[3]),
      paste0(round(pls.idl.roc$ci,3)[1],"-",round(pls.idl.
roc$ci,3)[3])))
kable(auc.crit.df)

```

| <b>Model.Type</b>   | <b>AUC</b> | <b>X95..CI</b> |
|---------------------|------------|----------------|
| WHO criteria        | 0.757      | 0.691-0.823    |
| Clinician Criteria  | 0.774      | 0.726-0.821    |
| Penicillin Criteria | 0.723      | 0.576-0.87     |
| Ideal Criteria      | 0.643      | 0.412-0.874    |

Compare variable importance for the different classification criterion



```

vic=varImp(train.model.pls,useModel=T,scale=F)
vic.cd=varImp(train.model.pls.cd,useModel=T,scale=F)
vic.tr=varImp(train.model.pls.pres,useModel=T,scale=F)
vic.idl=varImp(train.model.pls.idl,useModel=T,scale=F)

vi=c("vic","vic.cd","vic.tr","vic.idl")
for(i in vi){
  cmd=paste0("row.names(",i,"$importance)[row.names(",i,"$importance)=='Age.lt.12m
']='Age < 12m'")
  eval(parse(text=cmd))
  cmd=paste0("row.names(",i,"$importance)[row.names(",i,"$importance)=='Respirator
y.Rate.gt.70']='Respiratory.Rate > 70'")
  eval(parse(text=cmd))
  cmd=paste0("row.names(",i,"$importance)[row.names(",i,"$importance)=='Temperatur
e.gt.39C']='Temperature > 39C'")
  eval(parse(text=cmd))
}

library(cowplot)

```

```

ggdraw()+
  draw_plot(ggplot(vic)+ggtitle("WHO guidelines")+theme(axis.text=element_text(siz
e=9)),x=0,y=0.75,width=1,height=.25) +
  draw_plot(ggplot(vic.cd)+ggtitle("Clinician Diagnosis")+theme(axis.text=element_
text(size=9)),x=0,y=.5,width=1,height=.25) +
  draw_plot(ggplot(vic.tr)+ggtitle("Penicillin Monotherapy")+theme(axis.text=elemen
t_text(size=9)),x=0,y=.25,width=1,height=.25) +
  draw_plot(ggplot(vic.idl)+ggtitle("Ideal Population")+theme(axis.text=element_te
xt(size=9)),x=0,y=0,width=1,height=.25)

```

### WHO guidelines

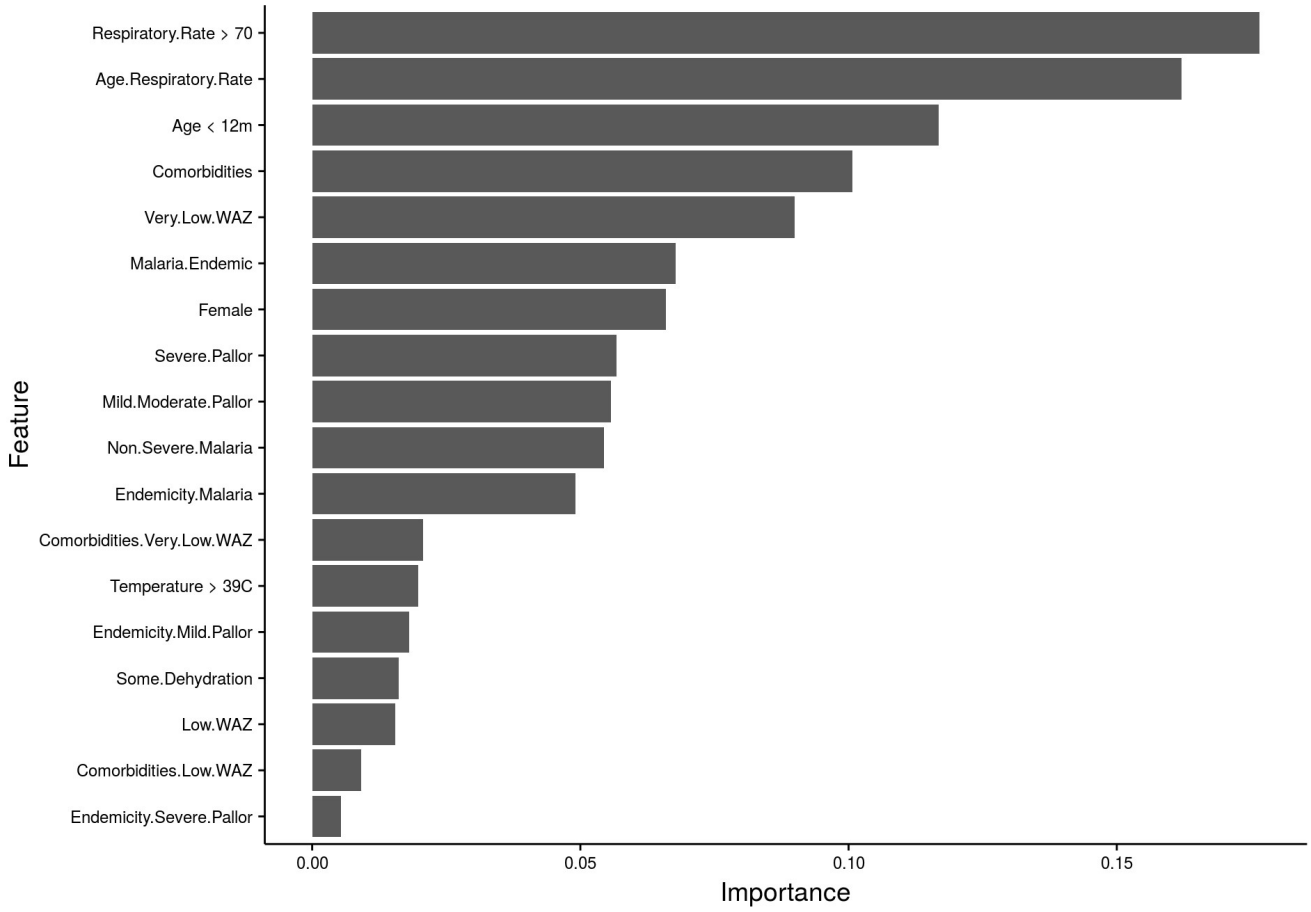

### Clinician Diagnosis

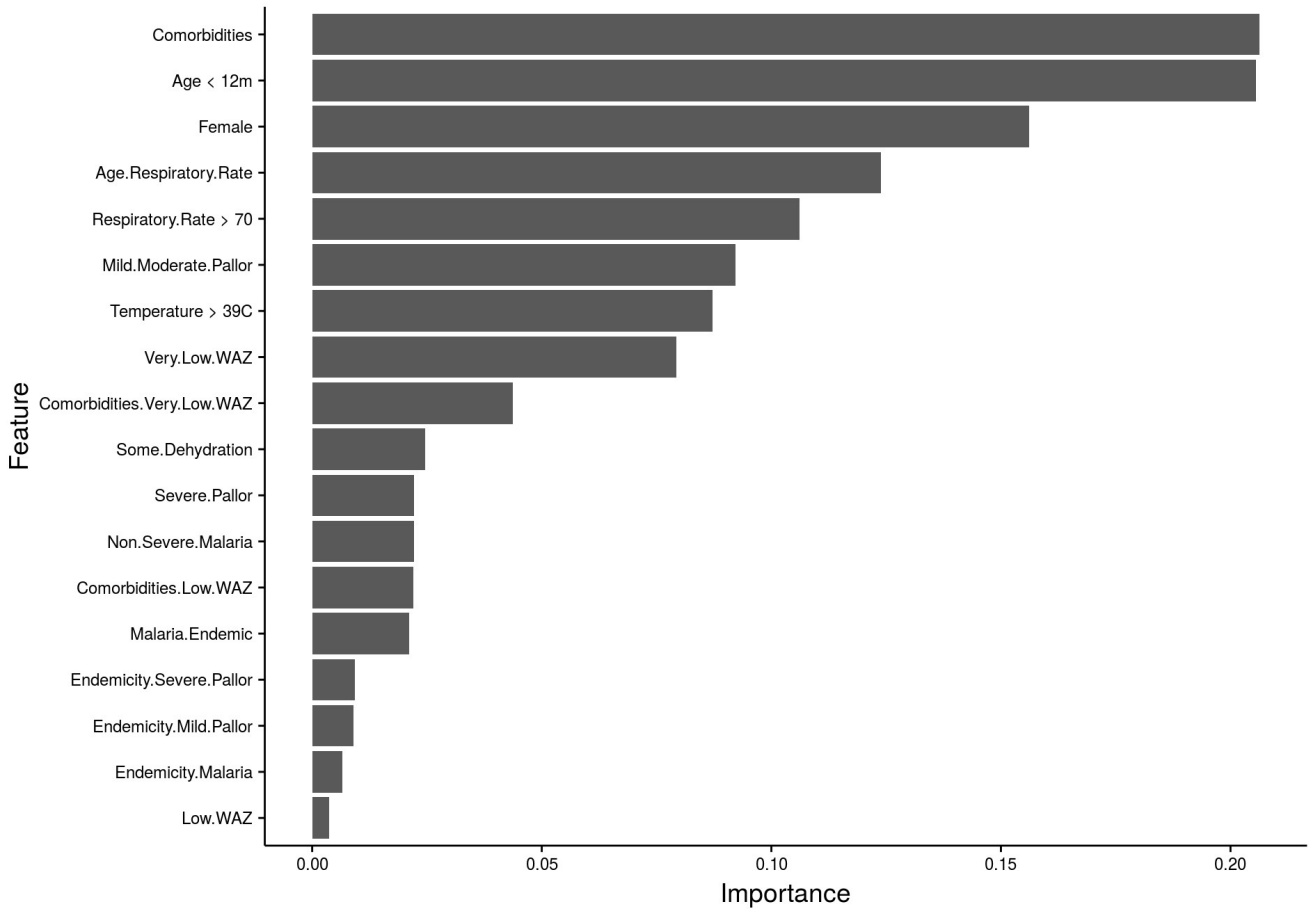

### Penicillin Monotherapy

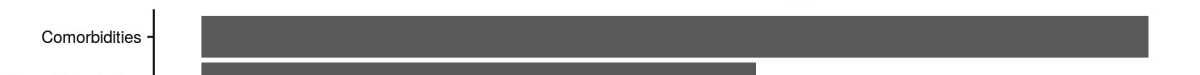

## 6.2 Comparing results with complete case analysis

### 6.2.1 Generate models' confusion matrix

```

load(file="pneumonia.rda")

pneumonia=pneumonia[,copy(.SD),.SDcols=c("age.lt.12m","female","tachypnoea","high.fever","pneum.severity.Non.severe","pneum.severity.Severe","pneum.severity.Very.Severe","pallor.Mild.Moderate","pallor.Severe","dehydration.Some.dehydration","waz.Moderate","waz.Severe","mal.end","malaria.Non.severe.malaria","cormobidity","mortality","ns.pneum","clinician.diagnosis")]

pneumonia[,`None Severe`=0]
pneumonia[pneum.severity.Non.severe==1 | pneum.severity.Severe==1,`None Severe`=1]
pneumonia[,pneum.severity.Non.severe=NULL]
pneumonia[,pneum.severity.Severe=NULL]
pneumonia[!is.na(clinician.diagnosis),clinician.diagnosis:=ifelse(clinician.diagnosis==1,NA_real_,ifelse(clinician.diagnosis==2,1,ifelse(clinician.diagnosis==3,1,0)))]

pneumonia = pneumonia[,lapply(.SD,as.character)]
pneumonia = pneumonia[,lapply(.SD,as.numeric)]

setnames(pneumonia,
c("age.lt.12m","female","high.fever","pneum.severity.Very.Severe","tachypnoea","waz.Moderate","waz.Severe","dehydration.Some.dehydration","mortality","pallor.Mild.Moderate","pallor.Severe","ns.pneum","clinician.diagnosis","None Severe","mal.end","malaria.Non.severe.malaria","cormobidity"),
c("Age.lt.12m","Female","Temperature.gt.39C","Severe.Pneumonia","Respiratory.Rate.gt.70","Low.WAZ","Very.Low.WAZ","Some.Dehydration","Mortality","Mild.Moderate.Pallor","Severe.Pallor","Severity.Treatment","Clinician.Diagnosis","None.Severe","Malaria.Endemic","Non.Severe.Malaria","Comorbidities"))

suppressMessages({

  pneumonia[,Age.Respiratory.Rate:=ifelse(!is.na(Age.lt.12m) & !is.na(Respiratory.Rate.gt.70),0,NA_integer_)]
  pneumonia[Age.Respiratory.Rate==0 & Age.lt.12m==1 & Respiratory.Rate.gt.70==1,Age.Respiratory.Rate:=1]

  pneumonia[,Comorbidities.Low.WAZ:=ifelse(!is.na(Comorbidities) & !is.na(Low.WAZ),0,NA_integer_)]
  pneumonia[Comorbidities.Low.WAZ==0 & Comorbidities==1 & Low.WAZ==1,Comorbidities.Low.WAZ:=1]

  pneumonia[,Comorbidities.Very.Low.WAZ:=ifelse(!is.na(Comorbidities) & !is.na(Very.Low.WAZ),0,NA_integer_)]
  pneumonia[Comorbidities.Very.Low.WAZ==0 & Comorbidities==1 & Very.Low.WAZ==1,Comorbidities.Very.Low.WAZ:=1]

  pneumonia[,Endemicity.Malaria:=ifelse(!is.na(Malaria.Endemic) & !is.na(Non.Severe.Malaria),0,NA_integer_)]
  pneumonia[Endemicity.Malaria==0 & Malaria.Endemic==1 & Non.Severe.Malaria==1,Endemicity.Malaria:=1]

  pneumonia[,Endemicity.Mild.Pallor:=ifelse(!is.na(Malaria.Endemic) & !is.na(Mild.

```

```

Moderate.Pallor),0,NA_integer_]
  pneumonia[Endemicity.Mild.Pallor==0 & Malaria.Endemic==1 & Mild.Moderate.Pallor=
=1,Endemicity.Mild.Pallor:=1]

  pneumonia[,Endemicity.Severe.Pallor:=ifelse(!is.na(Malaria.Endemic) & !is.na(Sev
ere.Pallor),0,NA_integer_)]
  pneumonia[Endemicity.Severe.Pallor==0 & Malaria.Endemic==1 & Severe.Pallor==1,En
demicity.Severe.Pallor:=1]

  setcolorder(pneumonia,c("Age.lt.12m","Female","Respiratory.Rate.gt.70","Temperat
ure.gt.39C","Severe.Pneumonia","Mild.Moderate.Pallor","Severe.Pallor","Some.Dehydr
ation","Low.WAZ","Very.Low.WAZ","Malaria.Endemic","Non.Severe.Malaria","Comorbidit
ies","Severity.Treatment","Clinician.Diagnosis","None.Severe","Age.Respiratory.Rat
e","Comorbidities.Very.Low.WAZ","Comorbidities.Low.WAZ","Endemicity.Malaria","Ende
micity.Mild.Pallor","Endemicity.Severe.Pallor","Mortality"))
})

#Based on WHO guidelines
pneumonia.ns=pneumonia[None.Severe==1,copy(.SD)]
pneumonia.ns[,None.Severe:=NULL]
pneumonia.ns[,Clinician.Diagnosis:=NULL]
pneumonia.ns[,Severity.Treatment:=NULL]
pneumonia.ns[,Severe.Pneumonia:=NULL]

dataset=pneumonia.ns[!is.na(Mortality),copy(.SD)]
dataset$Mortality=factor(dataset$Mortality,levels=c(0,1),labels=c("Alive","Dead"))

dataset.tr=copy(dataset)

##For complete cases
dataset.comp=copy(dataset.tr)
dataset.comp=dataset.comp[complete.cases(dataset.comp),copy(.SD)]
dataset.comp=as.data.frame(dataset.comp)

set.seed(197)
train.ids.comp=sample(seq(nrow(dataset.comp)),round(nrow(dataset.comp)*0.67),repla
ce=F)

dataset.x.comp=dataset.comp[,1:(col.len-1)]
dataset.y.comp=dataset.comp[,col.len]

dataset.x.tr.comp=dataset.x.comp[train.ids.comp,]
dataset.y.tr.comp=dataset.y.comp[train.ids.comp]

dataset.x.ts.comp=dataset.x.comp[-train.ids.comp,]
dataset.y.ts.comp=dataset.y.comp[-train.ids.comp]

tune.len=length(dataset.x.tr.comp)

```

## PLS-DA model

```

set.seed(197)
train.model.pls.comp=train(x=dataset.x.tr.comp
                           ,y=dataset.y.tr.comp
                           ,method="pls"
                           ,trControl=ctrl
                           ,tuneLength = tune.len
                           ,importance=T
                           ,probMethod="Bayes"
                           ,metric="ROC"
)

```

### Confusion matrix for PLS-DA model (complete cases)

```

pred.cm.who.comp=predict(train.model.pls.comp,dataset.x.ts.comp)
cm.who.comp=confusionMatrix(pred.cm.who.comp,dataset.y.ts.comp,positive="Dead")
cm.who.comp

```

```

## Confusion Matrix and Statistics
##
##           Reference
## Prediction Alive Dead
##      Alive  1385   12
##      Dead   407   13
##
##           Accuracy : 0.7694
##           95% CI : (0.7493, 0.7886)
##      No Information Rate : 0.9862
##      P-Value [Acc > NIR] : 1
##
##           Kappa : 0.0333
##  Mcnemar's Test P-Value : <2e-16
##
##           Sensitivity : 0.520000
##           Specificity : 0.772879
##           Pos Pred Value : 0.030952
##           Neg Pred Value : 0.991410
##           Prevalence : 0.013759
##           Detection Rate : 0.007155
##      Detection Prevalence : 0.231150
##           Balanced Accuracy : 0.646440
##
##           'Positive' Class : Dead
##

```

### Logistic Regression model

```

set.seed(197)
train.model.log.comp=train(x=dataset.x.tr.comp
                           ,y=dataset.y.tr.comp
                           ,method="LogitBoost"
                           ,trControl=ctrl
                           ,tuneGrid=expand.grid(nIter=seq(15,195,15))
                           ,importance=T
                           ,metric="ROC"
)

```

```

## Warning in nominalTrainWorkflow(x = x, y = y, wts = weights, info =
## trainInfo, : There were missing values in resampled performance measures.

```

### Confusion matrix for Logistic model (complete cases)

```

pred.cm.log.comp=predict(train.model.log.comp,dataset.x.ts.comp)
cm.log.comp=confusionMatrix(pred.cm.log.comp,dataset.y.ts.comp,positive="Dead")
cm.log.comp

```

```

## Confusion Matrix and Statistics
##
##           Reference
## Prediction Alive Dead
##   Alive  1379    9
##   Dead   413   16
##
##           Accuracy : 0.7677
##           95% CI   : (0.7476, 0.787)
##   No Information Rate : 0.9862
##   P-Value [Acc > NIR] : 1
##
##           Kappa   : 0.0457
##  Mcnemar's Test P-Value : <2e-16
##
##           Sensitivity : 0.640000
##           Specificity : 0.769531
##   Pos Pred Value   : 0.037296
##   Neg Pred Value   : 0.993516
##   Prevalence       : 0.013759
##   Detection Rate   : 0.008806
##   Detection Prevalence : 0.236103
##   Balanced Accuracy : 0.704766
##
##           'Positive' Class : Dead
##

```

```

suppressWarnings({
set.seed(197)
train.model.svm.comp=train(x=dataset.x.tr.comp
                           ,y=dataset.y.tr.comp
                           ,method="svmLinear"
                           ,trControl=ctrl
                           ,tuneGrid=expand.grid(C=c(.0625,.125,.25,.5,1,2,4,8))
                           ,metric="ROC"
                           ,importance=T
                           ,probability=T
)
})

```

### Confusion matrix for SVM model (complete cases)

```

pred.cm.svm.comp=predict(train.model.svm.comp,dataset.x.ts.comp)
cm.svm.comp=confusionMatrix(pred.cm.svm.comp,dataset.y.ts.comp,positive="Dead")
cm.svm.comp

```

```

## Confusion Matrix and Statistics
##
##           Reference
## Prediction Alive Dead
##      Alive  1413   13
##      Dead   379   12
##
##           Accuracy : 0.7843
##           95% CI   : (0.7646, 0.803)
##      No Information Rate : 0.9862
##      P-Value [Acc > NIR] : 1
##
##           Kappa   : 0.0327
##  Mcnemar's Test P-Value : <2e-16
##
##           Sensitivity : 0.480000
##           Specificity : 0.788504
##           Pos Pred Value : 0.030691
##           Neg Pred Value : 0.990884
##           Prevalence   : 0.013759
##           Detection Rate : 0.006604
##      Detection Prevalence : 0.215190
##           Balanced Accuracy : 0.634252
##
##           'Positive' Class : Dead
##

```

### Random Forest Model



```

set.seed(197)
train.model.rf.comp=train(x=dataset.x.tr.comp
                          ,y=dataset.y.tr.comp
                          ,method="rf"
                          ,trControl=ctrl.rf
                          ,tuneGrid=expand.grid(.mtry=c(1:tune.len))
                          ,importance=T
                          ,ntree=900
                          ,proximity=T
                          ,metric="ROC"
)

```

### Confusion matrix for Random Forest model (complete cases)

```

pred.cm.rf.comp=predict(train.model.rf.comp,dataset.x.ts.comp)
cm.rf.comp=confusionMatrix(pred.cm.rf.comp,dataset.y.ts.comp,positive="Dead")
cm.rf.comp

```

```

## Confusion Matrix and Statistics
##
##           Reference
## Prediction Alive Dead
##      Alive  1575   12
##      Dead   217   13
##
##           Accuracy : 0.874
##           95% CI   : (0.8578, 0.8889)
##      No Information Rate : 0.9862
##      P-Value [Acc > NIR] : 1
##
##           Kappa   : 0.0791
##  Mcnemar's Test P-Value : <2e-16
##
##           Sensitivity : 0.520000
##           Specificity : 0.878906
##      Pos Pred Value   : 0.056522
##      Neg Pred Value   : 0.992439
##           Prevalence  : 0.013759
##      Detection Rate   : 0.007155
##      Detection Prevalence : 0.126582
##      Balanced Accuracy : 0.699453
##
##           'Positive' Class : Dead
##

```

### Elastic Net model

```

set.seed(197)
train.model.net.comp=train(x=dataset.x.tr.comp
                           ,y=dataset.y.tr.comp
                           ,method="glmnet"
                           ,trControl=ctrl
                           ,tuneGrid=expand.grid(.alpha = seq(.05, 1, length = 15),
                                                  .lambda = c((1:5)/10))
                           ,metric="ROC"
                           ,family = "binomial"
)

```

### Confusion matrix for Elastic Net model (complete cases)

```

pred.cm.net.comp=predict(train.model.net.comp,dataset.x.ts.comp)
cm.net.comp=confusionMatrix(pred.cm.net.comp,dataset.y.ts.comp,positive="Dead")
cm.net.comp

```

```

## Confusion Matrix and Statistics
##
##           Reference
## Prediction Alive Dead
##      Alive  1595   16
##      Dead   197    9
##
##           Accuracy : 0.8828
##           95% CI   : (0.8671, 0.8972)
##      No Information Rate : 0.9862
##      P-Value [Acc > NIR] : 1
##
##           Kappa   : 0.0547
##  Mcnemar's Test P-Value : <2e-16
##
##           Sensitivity : 0.360000
##           Specificity : 0.890067
##           Pos Pred Value : 0.043689
##           Neg Pred Value : 0.990068
##           Prevalence   : 0.013759
##           Detection Rate : 0.004953
##           Detection Prevalence : 0.113374
##           Balanced Accuracy : 0.625033
##
##           'Positive' Class : Dead
##

```

### 6.2.2 AUC ROC curves for complete cases

```

pred.pls.comp=predict(train.model.pls.comp,dataset.x.ts.comp,type="prob")
pred.rf.comp=predict(train.model.rf.comp,dataset.x.ts.comp,type="prob")
pred.svm.comp=predict(train.model.svm.comp,dataset.x.ts.comp,type="prob")
pred.net.comp=predict(train.model.net.comp,dataset.x.ts.comp,type="prob")
pred.log.comp=predict(train.model.log.comp,dataset.x.ts.comp,type="prob")

roc(predictor=pred.rf.comp$Dead,response=dataset.y.ts.comp,levels=rev(levels(dataset.y.ts.comp)),ci=T,plot=T,xlab="1 - Specificity")

```

```

##
## Call:
## roc.default(response = dataset.y.ts.comp, predictor = pred.rf.comp$Dead, levels = rev(levels(dataset.y.ts.comp)), ci = T, plot = T, xlab = "1 - Specificity")
##
## Data: pred.rf.comp$Dead in 25 controls (dataset.y.ts.comp Dead) > 1792 cases (dataset.y.ts.comp Alive).
## Area under the curve: 0.7881
## 95% CI: 0.7078-0.8684 (DeLong)

```

```

rf.roc.comp=roc(predictor=pred.rf.comp$Dead,response=dataset.y.ts.comp,levels=rev(levels(dataset.y.ts.comp)),ci=T,plot=T,add=T,col="#0000FF",
               xlim=c(0,1),main="ROC curves plotting performance of different models")
pls.roc.comp=roc(predictor=pred.pls.comp$Dead,response=dataset.y.ts.comp,levels=rev(levels(dataset.y.ts.comp)),ci=T,plot=T,add=T,col="#CD0000")
log.roc.comp=roc(predictor=pred.log.comp$Dead,response=dataset.y.ts.comp,levels=rev(levels(dataset.y.ts.comp)),ci=T,plot=T,add=T,col="#000000")
svm.roc.comp=roc(predictor=pred.svm.comp$Dead,response=dataset.y.ts.comp,levels=rev(levels(dataset.y.ts.comp)),ci=T,plot=T,add=T,col="#FFFF00")
net.roc.comp=roc(predictor=pred.net.comp$Dead,response=dataset.y.ts.comp,levels=rev(levels(dataset.y.ts.comp)),ci=T,plot=T,add=T,col="#7CFC00")

legend('bottomright',c("AUC Results",
                       paste0("RF Model=",round(rf.roc.comp$auc[1],3)),
                       paste0("PLS-DA Model=",round(pls.roc.comp$auc[1],3)),
                       paste0("Logistic Model=",round(log.roc.comp$auc[1],3)),
                       paste0("Elastic-Net Model=",round(net.roc.comp$auc[1],3)),
                       paste0("Linear Kernel SVM Model=",round(svm.roc.comp$auc[1],3))),
      lty = c(1,1,1,1,1,1),col=c("#FFFFFF","#0000FF","#CD0000","#000000","#FFFF00","#7CFC00"))

```

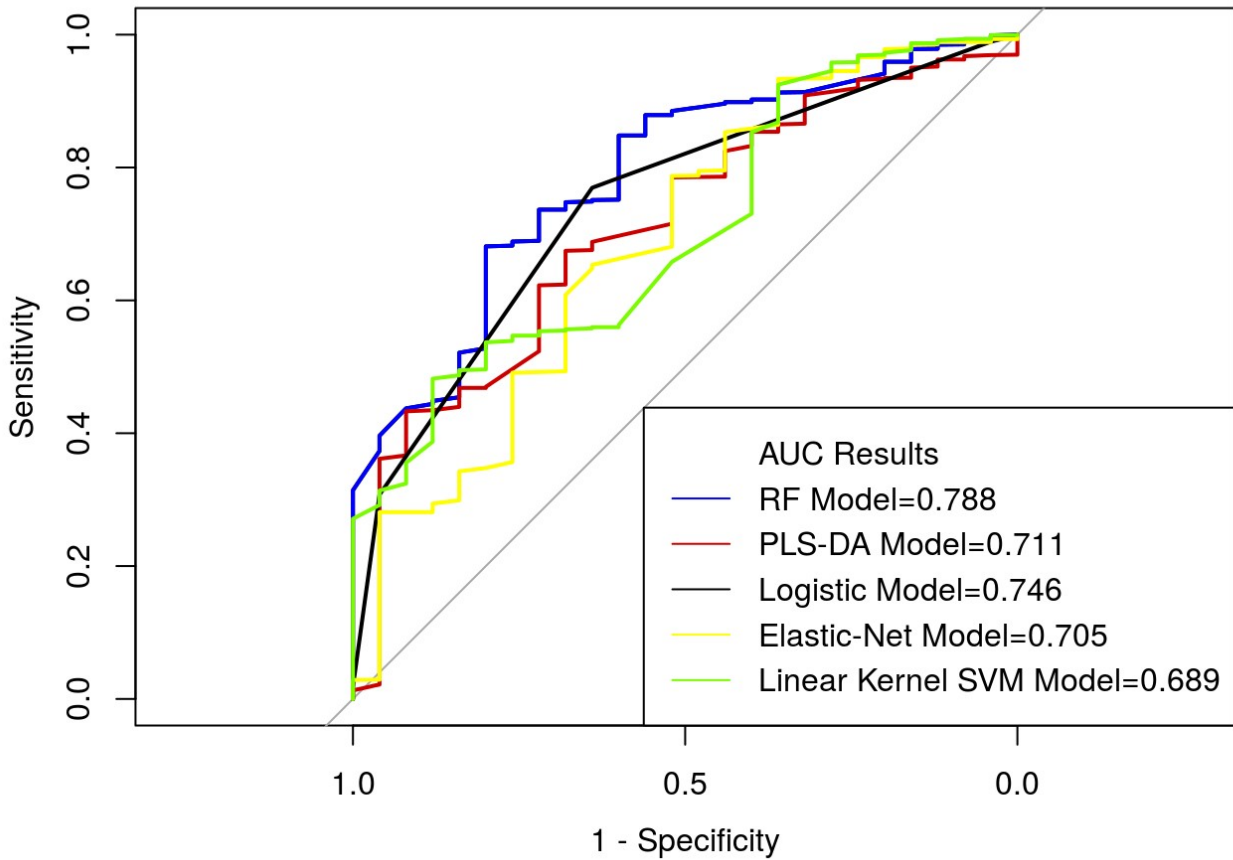

```

auc.comp.ci.df=data.frame("Model Type"=c("Logistic Model",
                                          "Random Forest",
                                          "PLS-DA",
                                          "Linear Kernel SVM",
                                          "Elastic-Net"),
                          "AUC"= c(round(log.roc.comp$auc[1],3),round(rf.roc.comp$auc[1],3),round(pls.roc.comp$auc[1],3),
                                   round(svm.roc.comp$auc[1],3),round(net.roc.comp$auc[1],3)),
                          "95CI"=c(paste0(round(log.roc.comp$ci,3)[1],"-",round(log.roc.comp$ci,3)[3]),
                                   paste0(round(rf.roc.comp$ci,3)[1],"-",round(rf.roc.comp$ci,3)[3]),
                                   paste0(round(pls.roc.comp$ci,3)[1],"-",round(pls.roc.comp$ci,3)[3]),
                                   paste0(round(svm.roc.comp$ci,3)[1],"-",round(svm.roc.comp$ci,3)[3]),
                                   paste0(round(net.roc.comp$ci,3)[1],"-",round(net.roc.comp$ci,3)[3])))
kable(auc.comp.ci.df)
    
```

| Model.Type     | AUC   | 95CI        |
|----------------|-------|-------------|
| Logistic Model | 0.746 | 0.665-0.828 |
| Random Forest  | 0.788 | 0.708-0.868 |
| PLS-DA         | 0.711 | 0.615-0.808 |

| <b>Model.Type</b> | <b>AUC</b> | <b>X95CI</b> |
|-------------------|------------|--------------|
| Linear Kernel SVM | 0.689      | 0.574-0.803  |
| Elastic-Net       | 0.705      | 0.611-0.798  |

```
stopCluster(c1)  
stopImplicitCluster()
```
